# Supplementary material for: Comparative transcriptome analysis of unripe and mid-ripe fruit of Mangifera indica (var. “Dashehari”) unravels ripening associated genes
Source: PubMed Central journal article supplement (PMC5009307; doi:10.1038/srep32557), 2016-09-02
Supplement: srep32557-s1.pdf [file srep32557-s1.pdf]

## Supplementary information

**Comparative transcriptome analysis of unripe and mid-ripe fruit of *Mangifera indica* (var. *Dashehari*) unravels ripening associated genes**

**Smriti Srivastava<sup>1,2</sup>, Rajesh K. Singh<sup>3</sup>, Garima Pathak<sup>1,2</sup>, Ridhi Goel<sup>1,2</sup>, Mehar Hasan Asif<sup>1</sup>, Aniruddha P Sane<sup>1</sup>, Vidhu A Sane<sup>1\*</sup>**

<sup>1</sup> CSIR- National Botanical Research Institute, Lucknow-226001, India. <sup>2</sup>Academy of Scientific and Innovative Research (AcSIR), Anusandhan Bhawan, 2 Rafi Marg, NewDelhi-110001. <sup>3</sup> Umeå Plant Science Centre, Umea, Sweden

\* Corresponding author. Tel : 91 522 2297978; Fax: 91 522 2205836

E.mail: [sanevidhu@rediffmail.com](mailto:sanevidhu@rediffmail.com), [va.sane@nbri.res.in](mailto:va.sane@nbri.res.in)

**Running title:** Transcriptome analysis of “Dashehari” mango

**Figure S1** Differential gene expression of top 100 contigs. Heat map was drawn using MeV software using standard settings.

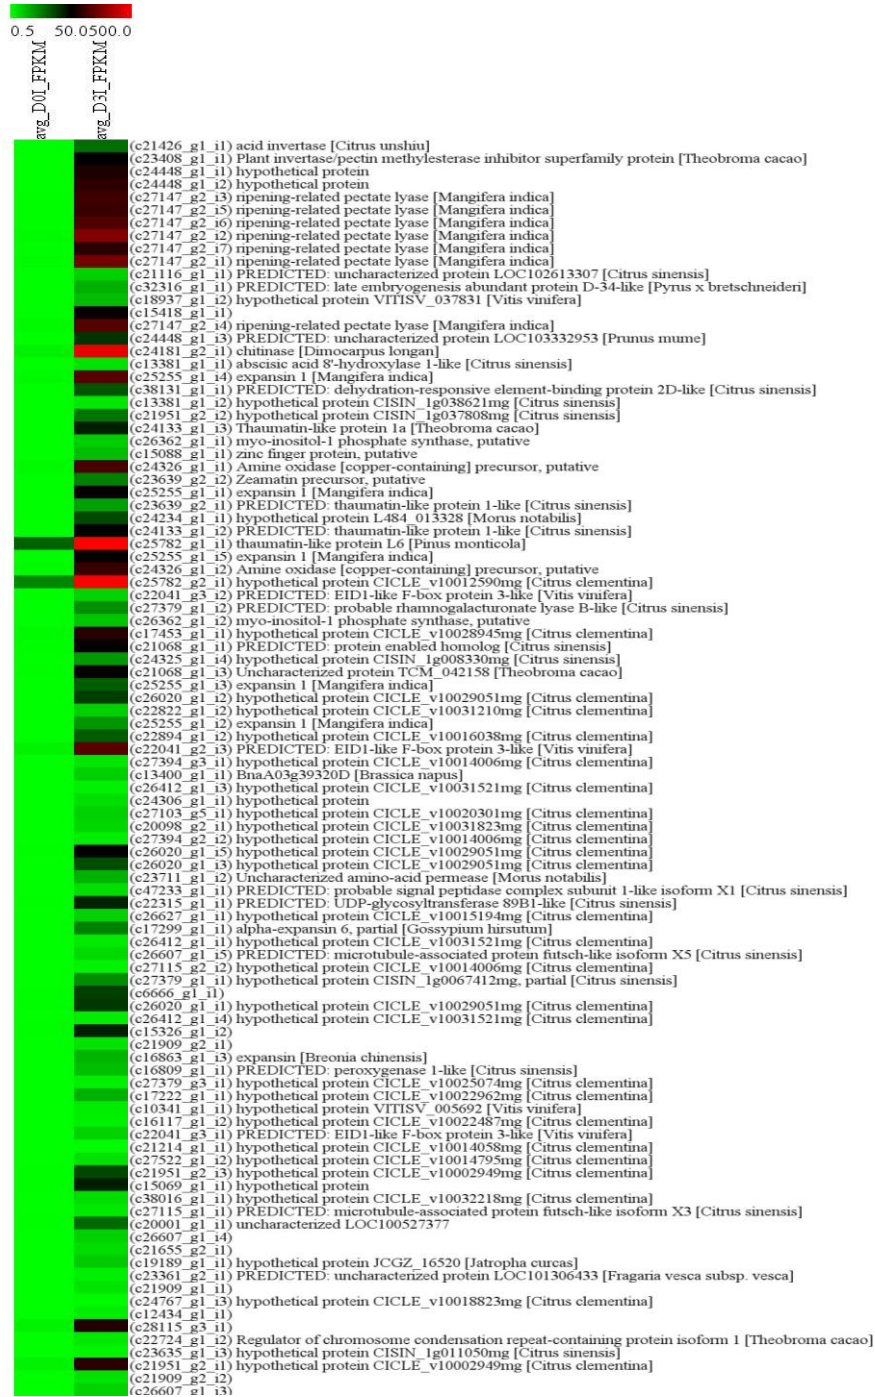

**Figure S2 a: Multiple sequence alignment of different contigs representing 1-aminocyclopropane-1-carboxylic acid synthase. Sequence with green background shows the start and stop codons. Mi stands for *Mangifera indica*, Cs for *Citrus sinensis*, At for *Arabidopsis thaliana* and Tc for *Theobroma cacao*.**

```

Mic48715 -----
Mic38692 -----
Mic32921 -----
AtACS6 -----
Mic50867 -----
CsACS -----
Mic18584 -----
Mic5878 -----
TcACS10 CCCAAAAATCTAAAAATCCCCCCTTCAAGCAAGGGACGGCTCAGAAAAGAAATCTATATCCC
Mic22459 -----

```

```

Mic48715 -----
Mic38692 -----
Mic32921 -----
AtACS6 -----
Mic50867 -----
CsACS -----
Mic18584 -----
TcACS10 ATAATTTCCCCCAAAAAATAAAAATAAAAAAGAAAAACCTCAAAAACCTCAGAAAACCAGAAAA
Mic22459 -----

```

```

Mic48715 -----
Mic38692 -----
Mic32921 -----
AtACS6 -----
Mic50867 -----
CsACS -----
Mic18584 -----
TcACS10 AAAAAAAAAAAAAAAAAAGGGAAAGAGACCACAAAGCTATTATTTTTATTCATCCGTTGAACA
Mic22459 -----

```

```

Mic48715 -----
Mic38692 -----
Mic32921 -----
AtACS6 -----
Mic50867 -----
CsACS -----
Mic18584 -----
TcACS10 TTAATCAGAAAACCCAGAAAACCCATATTTTCAATTCCCATTTTTCATCTTCATTTTGA
Mic22459 -----

```

```

Mic48715 -----
Mic38692 -----
Mic32921 -----
AtACS6 -----
Mic50867 -----
CsACS -----
Mic18584 -----
TcACS10 GTTTTAGTGGCCATGACTTCACTGCAATGACGCAAACCCGATTTTCCCGGACTCGGACCC

```

Mic22459 -----  
  
Mic48715 -----  
Mic38692 -----  
Mic32921 -----  
AtACS6 -----  
Mic50867 -----  
CsACS -----  
Mic18584 -----  
TcACS10 CCGAACCCGAAAAGGAACAAGCCAGAGGGGGAGGAGGCCGCCATGAGAGTGATAGTTC  
Mic22459 -----

Mic48715 -----  
Mic38692 -----  
Mic32921 -----  
AtACS6 -----  
Mic50867 -----  
CsACS -----  
Mic18584 -----  
TcACS10 CTCTACAAGGTGTTGTTCAAGGAAGAGGAGGCTTAATCTTAGGCTCCATAATTCCTTGCG  
Mic22459 -----

Mic48715 -----  
Mic38692 -----  
Mic32921 -----  
AtACS6 -----ATCAAACCATAACTTCCAAATCTCAACAGAACCA-----AAAACAAA  
Mic50867 -----AACAGAACCA-----AAAACAAA  
CsACS -----  
Mic18584 --CTCTTCTCTGTTCTCTCTTTCTCTCCTATCTATCTGCATATAT-----  
TcACS10 CGCTCTTTTACTTTCTGCAATTCATTTGAAGCGACACCGTAATGACCAGGATGACCAGA  
Mic22459 -----

Mic48715 -----  
Mic38692 -----  
Mic32921 -----  
AtACS6 AGAAACC--TATATTAAAG-----  
Mic50867 AGAAACC--TATATTAAAG-----  
CsACS -----ATTACTT-----  
Mic18584 ATTTGCC--ATTTCGACACT-----  
TcACS10 ACGAATCGAATTC CCCGGGTCAAAAACAGGGGACACGGTCGCCGTCGTCGGGGCAGTTGA  
Mic22459 -----

Mic48715 -----  
Mic38692 -----  
Mic32921 -----  
AtACS6 -----AAGAAACAAAAAATGGTGGCTTTTGCAACAGAGAAGAAGCAAGA  
Mic50867 -----AAGAAACAAAAAATGGTGGCTTTTGCAACAGAGAAGAAGCAAGA  
CsACS -----TCAGAAACAGATTAAATGGCCTTCGCGTTGAGTAACCA  
Mic18584 -----CTCTAAGACACAAAAATGGCGTCCATCTTTAGAAAAACA  
TcACS10 CTGAGCTTCCTGGGTTGACACGTAATCTGTCTCGGGCTTTGCTATCGCCAAGAAGTCCGA  
Mic22459 -----

Mic48715 -----  
Mic38692 -----

Mic32921 -----  
AtACS6 TCTG----AATCTATTGTCTAAAAATCGCCTCCGGTGACGGTCACGGCGAGAATTCCTCTT  
Mic50867 TCTG----AATCTATTGTCTAAAAATCGCCTCCGGTGACGGTCACGGCGAGAATTCCTCTT  
CsACS AGTG----CAATTGTTGTCCAAGATTGCAGCCGGCAATGGCCATGGTGAAGATTCTCCGT  
Mic18584 AGAA----GAAATGTTGTCCAAGATTGCAATCGGTAATGGACATGGTGAAAAATCTCCAT  
TcACS10 GTGGACCCGTTTCAGTCTCAGGTCGAGTTAGTGGGATTGTGAAGGCTGCCGATTCTCCTT  
Mic22459 -----TTATTTCA-----GCTTTTAAATGGAAAAGGTTGTT--T

Mic48715 -----  
Mic38692 -----  
Mic32921 -----  
AtACS6 ATTTTCGATGGTTGGAAAGCTTATGAAGAAAACCCATTTACC-----CAATTGATAGAC  
Mic50867 ATTTTCGATGGTTGGAAAGCTTATGAAGAAAACCCATTTACC-----CAATTGATAGAC  
CsACS ATTTTCGATGGCTGGAAGCTTTCGAAAGTGATCCTTATCATC-----CCACCAAGAATC  
Mic18584 ATTTTTCGATGGGTTGGAAGGCATATGAAACTGATCCATATCATC-----CCACTAAGAATC  
TcACS10 ATTATGCCGGCTTAAGGCGGGTCAAGGAGGACCAGTATGATG-----AATTGGGTAATC  
Mic22459 TCTTTGTCAACTTATATTTGTTAAAAATAAACCTGTTTTTGTAAATTTCAATGTGGCTGATG

Mic48715 -----  
Mic38692 -----  
Mic32921 -----  
AtACS6 CTGACGGAGTTATTCAAATGGGTCTCGCTGAAAATCAGCTTTGTGGAGATTTGATGCGTA  
Mic50867 CTGACGGAGTTATTCAAATGGGTCTCGCTGAAAATCAGCTTTGTGGAGATTTGATGCGTA  
CsACS CTAATGGGGTTATCCAGATGGGTCTAGCTGAGAACCTGCTTTGCCATGAATTTGGTTGAAG  
Mic18584 CCAAGGGAGTCATCCAGATGGGTTTAGCCGAAAAATCTGCTTTGCTTTGATTTAGTTCAAG  
TcACS10 CGAATGGGGTCATCCAGCTGGGTTTAGCGAAAAACAAGTTGTCTGTTGGATTTGGTTAAGA  
Mic22459 AGTTTGAGCATTGCTATGTTATGTTTGGTTGACGTAGTTGTCATTAGATTTGGTTGAGG

Mic48715 -----  
Mic38692 -----  
Mic32921 -----  
AtACS6 AATGGGTTTTTAAAAACATCCAGAAGCTTCGATTTGT-----ACATCAGAAGGTGTGA  
Mic50867 AATGGGTTTTTAAAAACATCCAGAAGCTTCGATTTGT-----ACATCAGAAGGTGTGA  
CsACS ACTGGCTCATGAACAACCCAAAGGCTCCATTTGC-----TCAGCTGAAGGCCTAA  
Mic18584 AATGGGTTCTTAAGCAACCCAGAAGCCTCTATCTGC-----ACTGCCGAAGGTATAA  
TcACS10 ACTGGCTAGCAGAGAATGCGAGGGAAAGCGATCTTG-----GGAAATGGAAAGGAGC  
Mic22459 ATTTGGCTTGACCAGAATGCAAGAGAGGCGTTAGTGGGTGGAGGAGCAAATTTGTGAGCGAT

Mic48715 -----  
Mic38692 -----  
Mic32921 -----  
AtACS6 ATCAATTCAGTGACATTTGCCATTTTTCAAGATTATCATGGCTTGCCCTGAATTCAGACAAG  
Mic50867 ATCAATTCAGTGACATTTGCCATTTTTCAAGATTATCATGGCTTGCCCTGAATTCAGACAAG  
CsACS ATGAATTC AAGGGTATAGCTATCTTTCAAGATTATCACGGCTTGCCAGAGTTCAAGAAATG  
Mic18584 GTGATTTCAAGAGATATCGCTATCTTTCAAGATTATCACGGCTTGCCAGAGTTCAAGAAATG  
TcACS10 TGAGCATTAGCGGGATTGCAACTTACCAGCCTTTTGTGATGGATTGATGGAGTTCAAAGTGG  
Mic22459 CAAATAGAAAGGGGATTGCCAGTTACCATGCTTTTGTGATGGACTGATGGAGTTGAAAGTGG

Mic48715 -----  
Mic38692 -----  
Mic32921 -----  
AtACS6 CTGTAGCGAAAATTTATGGAGAAGACTAGAAAATAACAAAGTTAAGTTTGTATCCTGACCGGA  
Mic50867 CTGTAGCGAAAATTTATGGAGAAGACTAGAAAATAACAAAGTTAAG-----  
CsACS CTGTTGCAAAAATTTATGGGGAAAGTGAGAGGGAACAGAATTACATTCGATCCCCGACCGTA  
Mic18584 CTGTTGCAAAAATTTATGGCAAGAGTGAGAGGGAATAGAGTCAAATACGACCCCTGATCGAA

TcACS10 CTGTGGCAGGATTCATGGCTCAAGTCATGGAGAAAAGCTGTTTCCTTTAATCCTTCGCAGA  
Mic22459 CTGTTGCTGGGTTTATGTCCCAAGTCATGGAAAAAGAAATTTTCCTTCAATCCTTCACAAA

Mic48715 -----  
Mic38692 -----  
Mic32921 -----  
AtACS6 TTGTTATGAGCGGCGGGCGCAACCGGAGCACACGAGACGGTTGCTTTCTGTTTAGCTAATC  
Mic50867 -----  
CsACS TTGTTATGAGTGGTGGAGCAACCGGAGCTCATGAGACGGTTGCTTTCTGCTTAGCCGACC  
Mic18584 TTGTTATGAGCGGTGGAGCAACCGGAGCACATGAGACGGTTGCCTTTTGTGGCTGATC  
Mic5878 -----  
TcACS10 TAGTGCTGACTGCTGGTGCACCCCTGCAATCGAGATTCTTAGCTTCTGCTTAGCAGATG  
Mic22459 TAGTATTAACAGCTGGTGCATCTCCTGCAGTAGAGATACTCAGCTTCTGCCTTGCAGACA

Mic48715 -----TTGGTTTTCAGGTTTGATAGAGATTTGAGAT  
Mic38692 -----  
Mic32921 -----  
AtACS6 CCGGCGATGGTTTCTTAGTTCCAACCCCTTATTATCCAGGGTTTGATAGAGATTTGAGAT  
Mic50867 -----  
CsACS CCGGCGACGCATTTCTTAGTACCCACTCCCTATTATCCAGGATTTGATCGAGATTTGAGAT  
Mic18584 CCGGTGAAGCATTTTTGGTGCCACTCCTTACTATCCAGGATTTGATCGAGATTTGAGAT  
TcACS10 CTGGAAATGCATTTCTTGTTC AACACCATATTACCCTGGTTTTGACAGGGATGTAAAAAT  
Mic22459 GCGGGAATGCATTTCTTGTTC AACACCTTATCATCCTAGTCTTGATAGGGATGTAAAAAT

Mic48715 GGAGAACCGGAGTGAATCTTGTACCGGTTACTTGTTCATAGCTCTAATGGGTTCAAGATTA  
Mic38692 -----  
Mic32921 -----  
AtACS6 GGAGAACCGGAGTGAATCTTGTACCGGTTACTTGTTCATAGCTCTAATGGGTTCAAGATTA  
Mic50867 -----  
CsACS GGAGAACAGGAGTTCAACTTGTTCAGTTGTATGTGACAGCTCTAACGATTTCAAGGTCA  
Mic18584 GGAGAACAGGAGTTCAACTTTTTCCAGTTGTGTGTGACAGTTCTAACAAATTTCAAGATTA  
TcACS10 GGAGAACTGGGGTGGAGATAATACATGTTCCCTTGCCGAAAGTGCTGACAACCTTCAATTTGA  
Mic22459 GGCGAACTGGAGTAGACATAATCCCTGTTCCCTGCCGAGTGCTGACAACCTCAGTGTAA

Mic48715 CCGTGGAAGCCTTGGAAGCTGCTTACGAAAACGCGAGAAAATCGAATATTCGGTTAAGG  
Mic38692 -----  
Mic32921 -----  
AtACS6 CCGTGGAAGCCTTGGAAGCTGCTTACGAAAACGCGAGAAAATCGAATATTCGGTTAAGG  
Mic50867 -----  
CsACS CCATGGAAGCCTTAGAAGCGGCTTATGAAAAAGCCCAAGAATCCAACATCAGAATAAAGG  
Mic18584 CAAGAGAAGCCGTGGAAGCAGCATATGAAAAAGCTCAAGAAGACCACATCAGAATCAAGG  
TcACS10 GTATAACTGCTCTCGATATAGCATTCAACCAGGCAAAGAAAACGTGGGCTGAAAAGTGCCTG  
Mic22459 GTATTACTGCTCTAGATCGAGCTTTC AACCCAGGCTAGGAAGCGTGGTATCAGAGTTTCCTG

Mic48715 GTTTACTTGTAAACCAATCCTTCAAACCCGCTTGGTACGACGTTAGACCGGGAATGTTTGA  
Mic38692 -----  
Mic32921 -----  
AtACS6 GTTTACTTGTAAACCAATCCTTCAAACCCGCTTGGTACGACGTTAGACCGGGAATGTTTGA  
Mic50867 -----  
CsACS GTGTCCTTATTACCAATCCATCAAACCCATTTGGGCACTTTCTTAGACCGAGAAAACCTAA  
Mic18584 GTTTGCTCCTCACAAATCCATCGAACCCGCTGGGGACTTGTTTGGACAGAGAAAACCTAA  
TcACS10 GGATCATAATATCAAATCCATCAAATCCTGTTGGGAATCTTCTAAGTCGGGAAACCTTT  
Mic22459 GTATTATAATATCAAATCCTGCAAGTCTGTTGGCAATCTATTTAACCGGGATACACTTT

Mic48715 AGTCTCTTGTAACTTCACTAATGACAAAAGGGATTTCATCTTATTGCTGATGAGATTTATG  
Mic38692 -----  
Mic32921 -----  
AtACS6 AGTCTCTTGTAACTTCACTAATGACAAAAGGGATTTCATCTTATTGCTGATGAGATTTATG  
Mic50867 -----  
CsACS AAGATATAGTGAGCTTCATCAATGAAAAGAACATCCATTTAGTCTGTGATGAGATTTATG  
Mic18584 GAAGTTTAGTAAGCTTCATTAATGAAAAGAACATCCACTTAGTCTGCGACGAGATTTATG  
TcACS10 ATAACCTTTTAGACTTTGCCAGAGAGAAGAACATCCATATTGTCTCTAATGAAATATTGG  
Mic22459 ACAGCCTTCTGGACTTTGCTAGGGAGAAGAAGATCCATATAGTCTCTAACGAATTGCTAG

Mic48715 CTGCTACTACTTTTGG---TCAATCCGA-----  
Mic38692 -----  
Mic32921 -----  
AtACS6 CTGCTACTACTTTTGG---TCAATCCGAGTTCATAAGTGTTCGCGAAGTAATCGAGGAGA  
Mic50867 -----  
CsACS CTGCCACAGTGTTACCAAGGAGCCTAGTTTCGTTAGCATCGCGGAGATAATAGACCAAG  
Mic18584 CTGCCACAATCTTCATGGGCCAGCCGATTTTCATTAGCATCTCTGAAATTTATAGAAGAAG  
TcACS10 CTGGATGTACTCATGGAAATGAA---GAATTTGTGAGCATGGCTGAAATTTGTTGACCTGG  
Mic22459 TTGGGTCCACTTATGGAAAGTAA---GAATTTGTGAGCATGGCAGATATCATTGATGTAG

Mic48715 -----  
Mic38692 -----  
Mic32921 -----C  
AtACS6 TCGAAGATTGTAACCGCGATTGATACATATTGTGTATAGTCTATCTAAAGATATGGGTC  
Mic50867 -----  
CsACS ACATTGCATGCAATCGCAATCTCATTACATTTGTATACAGTCTTTCTAAGGACATGGGAT  
Mic18584 ATATTTACTGCAATCGCAATCTCATCCACCTTGTTTACAGTCTTTCAAAGGATCTGGGGT  
TcACS10 ---AAGATGTTGACCGGAAAAGAGTCCATCTAGTATACGGTTTGTCAAAAGATCTTTCTC  
Mic22459 ---AAGACCTTGACAGGGACAGAGTTCATATAGTATATGCTCTATCAGAAGACCTTTCTC

Mic48715 -----  
Mic38692 -----  
Mic32921 TGCCTGGTTTTAAGAGTTGGTATAGTATACTCTTACAATGACAGGGTGGTTTCAGATCGCAA  
AtACS6 TGCCTGGTTTTAAGAGTTGGTATAGTATACTCTTACAATGACAGGGTGGTTTCAGATCGCAA  
Mic50867 -----  
CsACS TCCCTGGCTTTAGGGTCGGTATCATTACTCGTACAATGATCAAGTAGTGAGCTGTGCTC  
Mic18584 TCCAGGCTTTAGGGTCGGCATTATATACTCATAACAACGATACAGTTGTGAGTTGCGCCC  
TcACS10 TGCCAGGCTTTAGGGTGGTGTATTTACTCTTTCAATGAGGAGGTTCTGGCTGCTGCGA  
Mic22459 TTCCAGGTTTTAGGATGGGAATTATTTACTCCTACAATGAGAATGTTCTGTCCGCTACTA

Mic48715 -----  
Mic38692 -----  
Mic32921 GGAAAATGTCGAGTTTCGGTCTTGTTCGTCACAAAACGCAGCATTTGATCGCTAAAATGT  
AtACS6 GGAAAATGTCGAGTTTCGGTCTTGTTCGTCACAAAACGCAGCATTTGATCGCTAAAATGT  
Mic50867 -----  
CsACS GCAAAAATGTCCTAGCTTTGGACTTGTATCCTCACAAAACCAACATTTAATCGCAACAATGT  
Mic18584 GCAAAAATGTCAGCTTTGGACTTGTATCATCACAACCTCAACATTTAATCGCTTCAATGT  
TcACS10 AAAAGTTGACGAGGTTCTCATCTATTTTCAGCTCCAACCCAGCGTCTGCTCATCTCTATGC  
Mic22459 GAAAAATGGCTAGGTTCTCATCTGTTTCAGCTCCAATTCAGCAATTGCTAGTTTCAATGC

Mic48715 -----  
Mic38692 -----  
Mic32921 TATCCGATGAAGAGTTTGTAGACGAGTTTATCCGCGAGAGCAAATTCGGTTAGCTGCAA  
AtACS6 TATCCGATGAAGAGTTTGTAGACGAGTTTATCCGCGAGAGCAAATTCGGTTAGCTGCAA  
Mic50867 -----

CsACS TATCGGATGATCAGTTTGTGGAGAAGTTCATCGCCGAGAGTGCTAAAAGAATAGCAGAAA  
Mic18584 TATCAGATGATGAATTTGTGGATAGGTTTACTTACTGAGAGTGCTAAAAGGCTTGCAAAAA  
TcACS10 TATCCGATACAAAATTTGTTCAAACATTTATTACCATTAACAGGGAGAGGCTTCATAGAA  
Mic22459 TTACCGACACTAAATTTGTTGACAAGTTCGTCAAGACTAATAGGGAGAGACTTGGAAGAA

Mic48715 -----  
Mic38692 -----  
Mic32921 GGCACGCTGAGATAAACCACCGGTTTAGATGGTTTAGGGATTGGTTGGTTAAAGGCCAAAAG  
AtACS6 GGCACGCTGAGATAAACCACCGGTTTAGATGGTTTAGGGATTGGTTGGTTAAAGGCCAAAAG  
Mic50867 -----  
CsACS GGCATAAGGCATTCACTTGGGGACTTTCCCAAGTGGGCATTGGGTGTTTAAAGAGCAATG  
Mic18584 GGCACAGAGCCTTCACATGGGGGCTATCTCAAGTAGGCATTGGTTGTTTGAAGAGCAATG  
TcACS10 TGTATGTTTCAAGTTCGTGGAAGGGTTGAAAAAATTTGGGCATAGAGTGATATAAGAGTAGTG  
Mic22459 TGTATGTTGAGTTTGCAGGAGGATTAAAACAGTTGGGCATTGAGTGCACAAAAGTAGTG

Mic48715 -----  
Mic38692 -----ACAGCAACGTTTGGATTTCGG  
Mic32921 CCGGTTTGTTCCTTGTGGATGGATTTAAGAAATCTTTTGAAGACAGCAACGTTTGGATTTCGG  
AtACS6 CCGGTTTGTTCCTTGTGGATGGATTTAAGAAATCTTTTGAAGACAGCAACGTTTGGATTTCGG  
Mic50867 -----  
CsACS CTGGCCTGTTTCTATGGATGGATTTGCATCATCTTCTGAAGGAGCAAACATACGAAGCTG  
Mic18584 CGGGGCTATTTTCTGGATGGATTTGCATCATCTTCTCAAGGAGCAAACATGATGAAGCAG  
TcACS10 GGGGTTTCTACTGTTGGGCTGATATGAGCGGGTTAATAAGCTCTTATAGTGAGAAAAGGGG  
Mic22459 GGGGTTTCTACTGTTGGGCTGACATGAGTGGATTAATCAGCTCTTACAGTGAGAAAAGGGG

Mic48715 -----  
Mic38692 AAACCGAACTATGGCGTGTGATTGTTTACCAAGTGAAGCTCAACGTGTCTCCAGGCGGTT  
Mic32921 AA-----  
AtACS6 AAACCGAACTATGGCGTGTGATTGTTTACCAAGTGAAGCTCAACGTGTCTCCAGGCGGTT  
Mic50867 -----  
CsACS AGATGGCGTTTATGGCGAGTGATAATTAACGAAGTCAAGCTTAATGTTTCTCCTGGATCTT  
Mic18584 AGATAGAACTGTGGAAAAGTGATAATCAACGAAGTAAATTAATGTTTCTCCGGGTTCTT  
TcACS10 AACTTGAGCTTTGGGATAAGTTGTTGAATATAGCCAAGGTCAATGTAATCCAGGGTCTT  
Mic22459 AGCTTGAACCTTTGGGATAAGTTGTTGAATGTGGCTAAGCTCAATGTAATTCCTGGATCTT

Mic48715 -----  
Mic38692 CGTTCCATTGCCATGAACCGGGATGGTTTAGAGTATGTTTTGCGAATATGGACCATAAGA  
Mic32921 -----  
AtACS6 CGTTCCATTGCCATGAACCGGGATGGTTTAGAGTATGTTTTGCGAATATGGACCATAAGA  
Mic50867 -----  
CsACS CTTTTCACTGCCC GAATCCAGGGTGGTTTAGAGTTTGGCTTCGCCAACATGGATGATCGGA  
Mic18584 CCTTTCATTGCGTAATCCAGGATGGTTTCGGGTTTGTGTTTGC AACATGGATGATGAAA  
TcACS10 GTTGTCAATTGTATTGAACCTGGATGGTTTCGCTTCTGTTTTGCACATGACAGAGAAAAG  
Mic22459 CTTGTCACTGTATTGAACCGAGATGGTTCTGTTTCTGTCTTACTTTGTTGACTGAAAAAG

Mic48715 -----  
Mic38692 CGATGGAGACAGCTCTAGAGAGGATTAGAGTGTTCCTAGCCAACCTTGAGGAGGAGACTA  
Mic32921 -----  
AtACS6 CGATGGAGACAGCTCTAGAGAGGATTAGAGTGTTCCTAGCCAACCTTGAGGAGGAGACTA  
Mic50867 -----  
CsACS CGATGGAAATTTGCTCTATCAAGAATTACAAGCTTTATGCTTAAGAATGTGGAAGCCAAGG  
Mic18584 CCACGGAAAGTTGCTTTAGCAAGAATCAGAAGTTTATGCGTAAGAATAAGGAAGCGAAGA  
TcACS10 ATATCCCTGTGGTTATGGAACGGATTTCAGAAAAGTTTCTGAAACCTGTAATTTGAATAGAT  
Mic22459 ATATCCCTGTAGTTATGGAACGAATTTCAAGAATTTCCAAAACCTGTAATTTCACTACTT



Mic48715 -----  
Mic38692 AACCGATGGCTGCAACAA----CTATGATGGCTAAAAAGAAGAAGAAGTGTGGCAGAGT  
Mic32921 -----  
AtACS6 AACCGATGGCTGCAACAA----CTATGATGGCTAAAAAGAAGAAGAAGTGTGGCAGAGT  
Mic50867 -----  
CsACS TGCCTAAT-----AAGAAGAAACTTTGCTGGCAAAGA  
Mic18584 TGCCTGCG-----AAGAAATTGTGCAGGCCAAAGA  
TcACS10 GAAATGTTGTTTGTATTCTATGGTTTTAGAC---AACCCGAGATTTTTTTAT-----  
Mic22459 GAGTGCAATTGGATTATTATT-----

Mic48715 -----  
Mic38692 AACCTCAGGTTAAGCTTTAGTGACACGAGGCG--GTTTCGATGATGGCTTCTTCTCGCCTC  
Mic32921 -----  
AtACS6 AACCTCAGGTTAAGCTTTAGTGACACGAGGCG--GTTTCGATGATGGCTTCTTCTCGCCTC  
Mic50867 -----  
CsACS AGCCTTCGGCTCAGCATGTCATCTCGAAGGATGGATGACTTCATGGCTTCACCATGCATG  
Mic18584 AGTCTCAGGCTCAGCACTTCATTCAGGAGATTGGATGATATCATGAACTCGCCATGCATG  
TcACS10 -----TGAAAGCTCTTTTCAGTTGACACTAA--AGCAGACAGTAGTAGTCCCTGGCCTG  
Mic22459 -----

Mic48715 -----  
Mic38692 ATTCGCCTG-----TGCCGCCT-----  
Mic32921 -----  
AtACS6 ATTCGCCTG-----TGCCGCCTT---CTCCGCTAGTCCGTGCACA-GACTT  
Mic50867 -----  
CsACS TCTCC-----TCAAT---CACCTCTTGTTTCAGGCCCG-GACTT  
Mic18584 TCTCC-----TAATT---CACCTCTTGTTTCGAACCAG-AACTT  
TcACS10 GTTCAAGAACCAATCAATGCCATTAAGACCTTAATTTTCATATGTAGGGATCGGTGCAAA  
Mic22459 -----

Mic48715 -----  
Mic38692 -----  
Mic32921 -----  
AtACS6 AAGACCGTCTCATA-----TTTTGACTAGACCAGT-----  
Mic50867 -----  
CsACS AAGTGCAATAATAATTGGAGCTACACGTTTCGTATGACCAAGTCAAGTGAATTGAGGCAA  
Mic18584 AATCAATTAGGTGCAATAATCTCTGCACCAAGCTCAT-----AATTGATTAAAG  
TcACS10 TCACAAGCTATTGCATAGGGTTAAACTGTTTGGGATCTGTACGCACAAAAAGCTTGGAA  
Mic22459 -----

Mic48715 -----  
Mic38692 -----  
Mic32921 -----  
AtACS6 -CGTCGTAA-TTAAAAAGTCAATTCTTT-----AGATTGATTTT-GACACATTTA  
Mic50867 -----  
CsACS TTT-AGTTCAATTATTTTTTTCATTTTGTTCGTAAGAGAAACAAT-GGCTCATGCA  
Mic18584 TTCTGGTTCAAACAAGAGGTGAATTAGGA-----GACT-GCGCCAAGCT  
TcACS10 ATCTGATTGTCTCATGTTGAGCAATTGGATCAGAAGCTTGATTAGTATAAAAGATACTGGA  
Mic22459 -----

Mic48715 -----  
Mic38692 -----  
Mic32921 -----  
AtACS6 TCTGATTAAATCAAATGTATAGCTACGACTATCAAGTTGATTTTTTCTTTCTTTTA-----

Mic50867 -----  
CsACS TTTTTTTTTTCCTCCCTGTGTGGAGTCGACCAGAATTGTAGTCCTTCGTTTGG-GAT----  
Mic18584 CATAATATACCGTCAAGTGTAAAGAC--TTATGATTGACGCATTTATTTTGT-----  
TcACS10 TCTT----GTGAAACTGAATAAAAATAGAAAAGGTGTGTTGAATTTGGTGCATCAGTGTGT  
Mic22459 -----

Mic48715 -----  
Mic38692 -----  
Mic32921 -----  
AtACS6 -ATTTTGTATCTCATGTAATTTTAACCGGGTGAATA--ATATGAATTT-----G-AA  
Mic50867 -----  
CsACS -TTTTTATGCTTCGTGCATTTGTAATTCCTTTTAAAATTATTGFACTG-----T-TC  
Mic18584 ----TCGTAATTCCAATTTCAATAAATCTATGTGTACCTTGT-----T  
TcACS10 TTCTGTATCATTGATGAAGAGAGAGAGAGGGACGGAGGGAGGGCAGGATTTAAAGTTTT  
Mic22459 -----

Mic48715 -----  
Mic38692 -----  
Mic32921 -----  
AtACS6 ATCAGAATTTGTTT-----  
Mic50867 -----  
CsACS GTGTGTATTTTTTCG-----TTGGTGAAAAAGTCTATCATTTGC-----  
Mic18584 TTAAGTAT-----  
TcACS10 TCAAGTAAATTTTGAAGGAGACGGTCAAAAAATACATGCCATTGTCACAAATTAAGGACCA  
Mic22459 -----

Mic48715 -----  
Mic38692 -----  
Mic32921 -----  
AtACS6 -----  
Mic50867 -----  
CsACS -----  
Mic18584 -----  
TcACS10 AAACCTGAAGAACAGTAAAGTTGACAGACAGAC  
Mic22459 -----

**Figure S2b: Multiple sequence alignment of different contigs representing 1-aminocyclopropane-1-carboxylic acid oxidase. Sequence with green background shows the start and stop codons. Mi stands for *Mangifera indica*, Cs stands for *Citrus sinensis*.**

```

Mic33441 -----
Mic18647 -----
Mic23853 -----
Mic23735 -----
CsACO      TGGCTTGCTTTTTAGCCAAGTGGATGGTTGTGCTGGAGCCGTA CTGGTG-CACATTGACA
Mic26899 -----
Mic46112 -----
Mic31832 -----
Mic22984 -----GTGTCCCTATAAAATACCACCCCAACC
MiACO      -----

```

```

Mic33441 -----
Mic18647 -----TCTGACA-AAGTTA--
Mic23853 -----ATCTCTTTTA-AATTATTTGTTCACT-----ACTTGACTTTGGAAAGATAAAG--
Mic23735 -----
CsACO      TCCATGTGCTTCTCA-ATGTTTGCCTTCACGCGTCGAAGTTGGATTTGAAAAGAAAAAG--
Mic26899 -----GTAAAAG-----CAG----ACCAGTAAAGTGCGAAAAGAAAAGAA--
Mic46112 -----AACTTCAAATAGATTACTTTCAAAGAAGAGAGAGAGAA
Mic31832 -----
Mic22984 TCCACCCCTCTTTGCATTAAGAAACACACAGCACAGCTTGTGAGAGAAAAGAGTCAGCCAT
MiACO      -----CGGCACGAGCTTGTGAGAGAAAAGAGTCAGCCAT

```

```

Mic33441 -----
Mic18647 ---TGAGTCGCCTTCACATCAATCATAACTTTG-----TCTTT
Mic23853 ---TGAAGTAACAA---ACAATGTCGG-----TATA
Mic23735 -----
CsACO      ---CAGATGAACGAAAAACCAATTATGACGTTTATTTACTTCTGGAAGGAAAAATTATTTG
Mic26899 -----AAATGGAAGCTCTGAAACTCCCTATCATAGACCTCTCT-----TCAGCG
Mic46112 AGAAAGATGGAGAAGAACATGAAGTTTCCAGTAGTAGACTTGTCCAAGCTCAATGGGGAA
Mic31832 -----
Mic22984 TTGTGAGAGATGGAGAGCTTGAGTTTCCCAGTCATTAACTTAGAGAAACTAAATGGTGAG
MiACO      TTGTGAGAGATGGAGAGCTTGAGTTTCCCAGTCATTAACTTAGAGAAACTAAATGGTGAG

```

```

Mic33441 -----
Mic18647 ATCCCTTTCTCGTTACAATCACTTCTCCAACAGTTATCCTCAACACTCAGAATCGCAG
Mic23853 AATCTCAACG-ATTGTCCATAAACTTCA-CCATCATTATCTT---CAT-TCTCATCATTT
Mic23735 -----
CsACO      AATATCTCTG-CTGGAAGTTAACATCCTTGAATCCTTGACTG---CGAGTGCAATGGTGT
Mic26899 GACCGCTTCTCCGCT---GCCAATCAATCCGTCAG-----GCATGCGTAGAATAT
Mic46112 GAGAGAGACCAAACC---ATGGCTCTAATCAATGAA-----GCTTGTGAGAATTGG
Mic31832 -----
Mic22984 GAGAGAGCTGCCACC---ATGGAGAAGATTAAAGAT-----GCTTGTGAGAACTGG
MiACO      GAGAGAGCTGCCACC---ATGGAGAAGATTAAAGAT-----GCTTGTGAGAACTGG

```

```

Mic33441 -----
Mic18647 GTCCTCAATCAACACGAGCGAAAAATGGTGACCACTATTCCACATGAAGCA-----CAG
Mic23853 TTCTTGTCTCAGTGAACCAGAATATGGACA-----TTTCA-----AAT
Mic23735 -----AACCCA-----TCT

```

CsACO GATCTCTATCA-AGCAATAAACAATG GATATCTCCGATGCCAGTAGAACG-----ACC  
Mic26899 GGTTTCTTTTATCTGGTGAATCATGGAGTAGATGAGGAATTGCTTGGAAACCATGTTTGTAT  
Mic46112 GGCTTCTTTGAGATAGTGAACCATGGATTACCACATGACTTAATGGACAAGATCGAGAAG  
Mic31832 -----  
Mic22984 GGCTTCTTTGAGTTGGTGAACCATGGGATACCCATTGAGGAACTTGACACTCTGGAGAGG  
MiACO GGCTTCTTTGAGTTGGTGAACCATGGGATACCCATTGAGGAACTTGACACTCTGGAGAGG

Mic33441 -----  
Mic18647 CTGACGATGGAACCCAACCGCATCGAACAAGTGAATTAAAAAGCTTTTCGAT-GACACAAA  
Mic23853 GCCGTTGAAGCATCAGATTATGACAGAGCCGAAGAGCTTAAGAGCTTTGATGC-CACAAA  
Mic23735 TCTGAAACTGTATCGGATTATGATCGAGCTAGAGAGCTTCAAGCTTTTGTATGACAACAAA  
CsACO ACGCAAACGTGACGGACTACGACAGAGCTAAAGAGGTTTCAGGCTTTTGTATGA-TACAAA  
Mic26899 CAGAGTAGGAAATTTCTTCTCACTTCCCTTGGCACACAAGATGACTTTGGCTCGCAAAGAA  
Mic46112 ATGACAAAAGGACCATTACAAGACATGCCAAGAA-----  
Mic31832 -----GGAA-----  
Mic22984 AAGACAAAAGAGCACTACAGAAAATGTATGGAA-----  
MiACO AAGACAAAAGAGCACTACAGAAAATGCATGGAA-----

Mic33441 -----  
Mic18647 AGCCGGCGTTAAAGGA-CTCGTTGATGCCGGAATTGACAAGATTTCCAGGATATTTCTTTA  
Mic23853 AGCTGGAGTTAAAGGA-TTAGTAGACTCTGGGATTGTGAAAATTTCCAGGATATTCATTC  
Mic23735 AGCCAGCGTCAAAGGA-TTAGTAGATGCTGGAATTCTGAATGTTGCAAGGATATTCATTC  
CsACO AGCCGGTGTCAAAGGA-TTAGTGGATGCTGGAATTGTGAATATTTCCGAGGATATTCATTC  
Mic26899 CATAGAGGTTACACGCCTCT--CTATGCTGAGAATCTT-----GACCCC-----  
Mic46112 --CAAAAAGT-----  
Mic31832 --GAGAGATTCAAGGAATCGATTAAAGAACAGAGGTTCTT-----GACTCTCTTCGC--  
Mic22984 --CAAAGGTTCAAGGAACCTTGTGGCTAGTAAAGCTTTG-----GAAGGTGTTCAA--  
MiACO --CAAAGGTTCAAGGAACCTTGTGGCTAGTAAAGCTTTG-----GAAGGTGTTCAA--

Mic33441 -----  
Mic18647 GCCCACCTATGCTAATCAGGTTTCTAGTGCTACAGAATA-----TAAGTTTCCGA  
Mic23853 GACCAGCGGATGAACTAGCCCAGGAGAAG---TTGACCAGTCATCAACACAACCTTTCAAG  
Mic23735 GCCCACCTTCTCCTAATGAGCTTGTTCACAGGTCAAAATATCACAAGAACAATCTGCAGG  
CsACO GACCGCTGAGGAGCTTGTTCGAGGAGTTG-----ACCAGTCATCAGACCAATTTCTCAAG  
Mic26899 -----TCTTCTTCTTCTAAAGGTGACTCAAAAAGA-----GAGTTTCTACA  
Mic46112 -----  
Mic31832 -----TCTGAAGTCAACGACGTTGACTGGGAATC-----CACTTCTACC  
Mic22984 -----ACTGAGATCAAAGATATGGACTGGGAGAG-----CACCTTCTATG  
MiACO -----ACTGAGATCAAAGATATGGACTGGGAGAG-----CACCTTCTATG

Mic33441 -----  
Mic18647 TTATCGACCTGGGAAGACTTGATAAAGATCCTGGTCAACGCAAGGAGATTGTTGAAAAAG  
Mic23853 TACCGGTCGTAGATCTTGATGGCATCAAAGACGACAGGCTCAAGGAGATTGTTGATGAGG  
Mic23735 TCCCTCATA-----TATCTTTGAGGCAAACACGAGGAGGTTGCTGATCAGG  
CsACO TACCGGTTATCGATCTTGATGGCGTCAGAGGCAATAAGCTTGAGGAGATTGTTGATCAAG  
Mic26899 TTGGTCCTTTGAAGGA-----ACTCTTAGTAGCTTGAATCAGTGGCCCTCTGAAGAAG  
Mic46112 -----  
Mic31832 TCAAGCACCTTCCCGTC-----T-----CTAATATCTCCGATGTCCCTGATCT---CG  
Mic22984 TTCGCCATCTCCCTCAG-----A-----CAAACCTAAATGAACTCCCAGATCT---CG  
MiACO TTCGCCATCTCCCTCAG-----A-----CAAACCTAAAGTGACCCCCGATCT---CG

Mic33441 -----  
Mic18647 TTCGAAATGCTTCGGAGACGTGGGGGTTCTTTTCAGGTTATCAATCATGGGATTCCTGAGA  
Mic23853 TCCGGGTTGCATCCGAGACATGGGGATTCTTTCAAGTTGTGAATCATGGGATCCCCCTTAA  
Mic23735 TTAGAAGTGCATCCGAGACATGGGGTTTTTTTCAAGTTGTGAATCATGGGATCACCTTGA

CsACO TTCGGGCTGCAGCAGAGACATGGGGCTTCTTTCAAGTGGTGAATCACGGTATTCCCTTAA  
Mic26899 TT-----TTGCCATCTTGGAGATCCACAATGGACCTTTTCTATAAAA  
Mic46112 -----  
Mic31832 AC-----GACGATTACAGAACGTTAATGAAAGACTTCGCCGGA  
Mic22984 AT-----GATGAATACAGGAAGGTGATGAAGGAATTTGCATCA  
MiACO AT-----GATGAATACAGGAAGGTGATGAAGGAATTTGCATCA

Mic33441 -----  
Mic18647 GCGTTCTTGAGGAGATGAAGGATGGGGTTCGCAGGTTTTATGAGCAAGATTTTGAGGTGA  
Mic23853 CTGTGTTAGAAGAAGTGCTTCATGGGGCACGAAAATTCATGAACAAGACCTTGAGTTGA  
Mic23735 ATGT-----  
CsACO ATGTGTTGGAAGAGATTATTGAAGGGATACGCAAGTTAATGAACAAGACGTTGAGTTGA  
Mic26899 AAAGTCTG--GATATTGGATGTAGATTAATCCATTTAATAGCTCTAGCTTTGGAATTGG  
Mic46112 -----  
Mic31832 AAGATAGAG--AAGTTGTCGGAGGAGCTACTGGATCTGCTGTGCGAGAATCTCGGTTTAG  
Mic22984 AAATTGGAG--AAACTAGCAGAGGAACTGCTGGACTTGTGTGTGAGAACCTTGGATTGG  
MiACO AAATTGGAG--AAACTAGCAGAGGAACTGCTGGACTTGTATGTGAGAACCTTGGATTGG

Mic33441 -----  
Mic18647 AAAAAAATGGT-----ACACCCGTGATTTTACCAGAAAGTTGATCTACA  
Mic23853 AGAAAGAGTTAT-----ATTCTCGTGATCCAAAGAGAGGCGTCGTATTCT  
Mic23735 -----  
CsACO AGAAAGAGTTTT-----ATACCCGTGACCGGGCAAGAAAATGTCAGATTCA  
Mic26899 ATGAAGATTTCTTTGAGAAAAGTGGGAGCATTGGATATGCCATCTGCATTTCTACGCTTGA  
Mic46112 -----  
Mic31832 AGAAGGGTTATTTAAAAAAGGTGTTTTACGGGTCGAAAAGACCGACTTTTGGAACCAAAG  
Mic22984 AGAAAGGTTACCTGAAGAAGACCTTCTATGGCTCAAAGGGGCCAACTTTTGGCACCAAGG  
MiACO AGAAAGGTTACCTGAAGAAGACCTTCTATGGTTCAAAGGGGCCAACTTTTGGCACCAAGG

Mic33441 -----  
Mic18647 -ATAGCAATTTTGACTTATACACAGGACCAGTGACGAACTGGCGGGATAACCATGTCTTGT  
Mic23853 -TCAGCAATCCAGATCTGTATCGATCTCCAAGTCTAATTGGAGGGATACTTTGGTTATT  
Mic23735 -----  
CsACO -ACAGCAACTTTGATCTGCATTAATCCCGGACAGCTAATTTGGAGGGACACGTTGACAATT  
Mic26899 TACACTATCCAGGCAAAATAGATTTGTCTGGTGAAGAAAATATATGGTGTCTCTGCTCATT  
Mic46112 -----  
Mic31832 -TCAGCAATTATCCACTTGTCTAATC--CGGACCTAGTCAAGGGTCTCCGAGCCCACA  
Mic22984 -TTAGCAACTACCCACCATGTCCACAAC--CCGATTTGATCAAGGGCCTCCGAGCCCACA  
MiACO -TTAGCCACTACCCACCATGTCCACAAC--CCGATTTGATCAAGGGCCTCCGAGCCCACA

Mic33441 -----  
Mic18647 TA---CATGGCTCCTCATCCTCCCAGTCAGAAAATTTACCAGCTGTTTGCAGAGATATA  
Mic23853 TCTACTTTAGCTTCGAAGCAATTTGATCCAAGTAATATACCAGAAGTCTGCAGAGACAGT  
Mic23735 -----  
CsACO TCTGCTTTAGCTTCCACCGATTTAGACCCCAACGAATACCCAGAAGTTTGCAGAGATGCT  
Mic26899 CAGATTATG-----GAATGATCACTCTCTAGCTACTGATGGGATTCC-----  
Mic46112 -----  
Mic31832 CCGACGCCGGCG--GCATC-----  
Mic22984 CCGACGCCGGTG--GCATCATCTTACTCTTCCAGGATGATAAGGTGAG-----  
MiACO CCGACGCCGATG--GCATCATCTTACTCTTCCAGGATGATAAGGTGAG-----

Mic33441 -----  
Mic18647 CTAGTGGAGTACTCGAAGCAAGTAATGGAACCTGGCTATGTATTGTTGAACTATTATCA  
Mic23853 TTAATGGCGTATATAAGAACTATTTCAAAGCTGGGGAACACTCTATTTGAACTGTTATCG  
Mic23735 -----

CsACO GTGAGAGAGTACATTAAAAATGTCACAAAATTTGGGTGAAACTCTGTTTGAATTATTATCA  
Mic26899 -----  
Mic46112 -----  
Mic31832 -----  
Mic22984 -----  
MiACO -----

Mic33441 -----  
Mic18647 GAGGCTCTTGGTTTGAACCAAGTCACCTGAAAAGACATGAATTGTGCTGAGGGGCTTGTA  
Mic23853 ATGGCTTTAGCGCTGAAACCTGAACATTTAAAAAGAGATGGGATGCACTGAAGGATTTAAT  
Mic23735 -----  
CsACO CTGGCTCTTGGGCTGAAGGCTGAACATTTACAAGAGATTGGATGCCCTAAAGAATACACC  
Mic26899 AGGACTACAGGTTTGTAGGGAGA-----  
Mic46112 -----  
Mic31832 -----  
Mic22984 CGGCCTCCAGCTT-CTG-----  
MiACO CGGCCTCCCAGCTTCTG-----

Mic33441 -----  
Mic18647 TTACTTTGCCATTACTATCCACCATGCCACAGCCAGAATTAGCAATCGGCACATCCAGG  
Mic23853 ATATCTTGCCCTCTACTATCCATCGTGCCCCAGCCAGATCTCACCTTGGGAGCTACCAAA  
Mic23735 -----  
CsACO CTTCCCTGCCACTACTATCCATCTTGCCCTCAGCCAGATTTGACATTGGGAGCTACCGGG  
Mic26899 -----  
Mic46112 -----  
Mic31832 -----  
Mic22984 -----  
MiACO -----

Mic33441 -----  
Mic18647 CACTCGGACAATGACTTTCTCACTGTACTTCTACAAGACCATGTTGGTGGCCTCCAAGTT  
Mic23853 CACACTGATCCTTCATTCTTTACTATAGTTTTTGCAAGACCAAAATCGGTGGTCTTCAAGTC  
Mic23735 -----  
CsACO CATTCAGACCCTTCATTTCTTACCATTCTTCTGCAAGACCAAAATCGGCGGCCTTCAAGTC  
Mic26899 -----AATTC  
Mic46112 -----  
Mic31832 -----  
Mic22984 -----  
MiACO -----

Mic33441 -----AAGCACTTATCTTTAACGTA  
Mic18647 CTTTCATCAAAAACAGTGGGTTGATGTGCTCCCACCCCTGGTGCTCTTGTGGTTAACATT  
Mic23853 TTCCATGAAAATCAGTGGGTTAATGTTGAACCCATTGCTGGAAGCTTGGTGGTAAATATA  
Mic23735 -----  
CsACO TTTTCATGACAATCAATGGGTTGGTGTCCAACCCATTGTGGGAGGCTTAGTGGTAAACATA  
Mic26899 AAAGAATCAAGGGCATGGGAGGAGGTGCCAAGTATCAAGGGGGCATTTCATTGTTAATATT  
Mic46112 -----  
Mic31832 -----  
Mic22984 -AAAGATGGGC--AGTGGATTGATGTGCCCCCTATGCGCCACTCCATTGTGGTTAACCTT  
MiACO -AAAGATGGGCAGTGGATATTGATGTGCCCCAATGCGCCACTCCATTGTGGTTAACCTT

Mic33441 GGAGATTTCTCCAGCTTATCTCGAATGACAAGTTTGTAAGCATGGAGCATAGAATTTTG  
Mic18647 GGAGATCTCATGCAGCTAGTATCAAATGACAAATTCATAAGCGTGGAGCATAGAGTACTG  
Mic23853 GGGGACTTTCTCCAGGTTATATCGAACAACAAGTTTAAAAGTGTGACCACAGAGTCCCTC  
Mic23735 -----

CsACO GGGGACTTCCTCGAGGTTGTATCAAACGACAAGTTCAAGAGTGTAAACCACAGAGTAGTC  
Mic26899 GGGGACATGATGGAGAGGTGGACTAATTGTTTATTTTCGGTCAACCCTTCATAGAGTGATG  
Mic46112 -----  
Mic31832 -----  
Mic22984 GGTGACCAGCTTGAGGTTATCACCAATGGCAAATACAAGAGTGTGGAGCACCGAGTAGTT  
MiACO GGTGACCAGCTTGAGGTTATCACCAATGGCAAATACAAGAGTGTGGAGCACCGAGTAGTT

Mic33441 GCAAATGGAGGTGAAGAGCCGCGCATTTTC-----  
Mic18647 GCGAACCGGGTAGGGCCAAGAATATCAGT-----  
Mic23853 GCCAGTGGATTTGTTCCAAGGATTTCTGT-----  
Mic23735 -----  
CsACO GCCGGTCATGTCGGTCCAAGGGTTTCCGT-----  
Mic26899 CCAACAGGACAAGAACGCTACTCTGCTGCATTCTTTTTGGATCCCAACAGTAACTGTGTA  
Mic46112 -----  
Mic31832 -----  
Mic22984 GCTCAAAGAGATGG-----CAACGGCCGCATGTCAATAGCTTCATT  
MiACO GCTCAAAGAGATGG-----CAACGGCCGCATGTCAATAGCTTCATT

Mic33441 -----  
Mic18647 -----  
Mic23853 -----  
Mic23735 -----  
CsACO -----  
Mic26899 GTGGAATGCCTGGAAAGTTGTTGTCAGTGAATCCTGTCCCCCAAGATTTCCCCCATCCGC  
Mic46112 -----  
Mic31832 -----  
Mic22984 CTACAACCTGGCAGTGATGCAGTTATCTATCCAGCACCACCATTGTTGGAAAAAGAAGC  
MiACO CTACAACCTGGCAGTGATGCAGTTATCTATCCAGCACCACCATTGTTGGAAACCAGAAGC

Mic33441 -----GGT-----CGCTTGTTCCTTTGTGCATACTTTTACTTCACCAAGTTCGAG  
Mic18647 -----GGC-----GAGCTTTTTTCAGCACAGATCTTCAGTCAGATTGCTCATCGAC  
Mic23853 -----AGC-----ATGCTTTTTTACTGGACATGCTACTGG-----AACCCCAA  
Mic23735 -----  
CsACO -----GGC-----ATGCTTTTTTCATGGGACATAATGCAGA-----AATCCCAA  
Mic26899 AGTGGGGACTACTTTAAAGAGCGGTTAAGACTTACATATGGATCAATAAGAGGAGCTTTCA  
Mic46112 -----  
Mic31832 -----  
Mic22984 AGAGGAGAAGAA--ACAAGTGTACCCAAAATTTGTTTTTGAAGACTACATGAAGCTGTAT  
MiACO AGAGGAGAAGAA--ACAAGTGTACCCAAAATTTGTTTTGTGAAGACTACATGAAGCTGTAT

Mic33441 AGTATATGGACCCATTAAAGAGCTTCTGTCTGAGCTAAAACCTCCA-----  
Mic18647 AGTTTATGGACCAATCCAAGAGTTGTTATCAGAAGAGAATCCTCCA-----  
Mic23853 GCTCTATGGACCAATTTAAAGAGTTAACATCAGATGAAAATCCACCT-----  
Mic23735 -----  
CsACO GTCTTATGGGCCGATCAAAGAGTTGACATCTGAAGAAAATCCTCCT-----  
Mic26899 GATTGGTGGTCGTATGCAAAAGTTAAAGTTTAAATACTTTCCCTTTTATAATGGGTGTCA  
Mic46112 -----  
Mic31832 -----  
Mic22984 GCCGGCTTGAA-----GTTCCAGGCAAAAAGAACC--CAGGTTTGAAGCCATGAAA  
MiACO GCCCGCTTGAA-----GTTCCAGGCAAAAAGAACC--CAGGTTTGAAGCCATGAAA

Mic33441 -----AAATACAGAGACACCACCTCGGAATCCTCCA---ATCACTATGTG  
Mic18647 -----AAGTACAGGGAAACCACAGTGAAAGACTATGTCGCATACTTTAAG  
Mic23853 -----GTTTACAGGGAATTTCTTGTTCCTGAATATTTCAACTTATATTTT  
Mic23735 -----

CsACO -----ATTTACAGAGATTTTCTTCCAAGTGAATGTTTTAGCAAACGATTT  
Mic26899 CCATTACAGCCCATATATAAAATTTTAACCCCTCAACATGTGCTTTT----CTGGGGATAAC  
Mic46112 -----  
Mic31832 -----  
Mic22984 GCTGTTGAAACCACTGTTAATCTGGGCCCAATTGCCACTGCTT-A---ATTAGAAAAG  
MiACO GCTGTTGAAACCACTGTTAATCTGGGCCCAATTGCCACTGCTT-A---ATTAGGAA---

Mic33441 GCTAGAAAAACCTAATGGGAATTCTTCGTTGGACCATTAA-----GGATCTGAAAC  
Mic18647 GGAAAGGGTCTCGATGGGACTTCTGCGCTGCTTCATTTCA-----GGCTATTAAGCT  
Mic23853 GCTAAGGTAGTTGGTGATAAGTCTGTTCTTTGTCAATTCA-----AGCTGTGAAGA  
Mic23735 -----  
CsACO TCTATGGCGGTTGATGACAATTCTCTCCTCCATCAGCTCA-----AGCTATGAAGC  
Mic26899 TGTATTTACCCCTCCTGTTTTTATTCTATTAGTTCATATTCTGCGGTTTGAAATATGAAAT  
Mic46112 -----  
Mic31832 -----  
Mic22984 AAAATGTAATTTACTGCTTAATTTTTTGTGTGTTGATGTCGTGTG----AAG-----C  
MiACO --AATGTAATTTACTGCTTAATTTTTTGTGTGTTGGTGTGGTGTG----AAG-----C

Mic33441 TTGAACCTATATCTCAGAGGT-----  
Mic18647 TCGCAAAGAAGATGAAATGAA----TATCTGGAT-----  
Mic23853 GGGAGAATACTTGAA--TAAA----GTTTGTAATCTTGTACGAATTATTAATAGGATCA  
Mic23735 -----  
CsACO CGACAGTATTTGTAT--TAAT----TATTCGTGT-TTG-----  
Mic26899 TTGGGCTTTGGTACAACAATATCA-TTCAATCAGGTGTGTTCAAATTTCTTACTGGGTAGC  
Mic46112 -----  
Mic31832 -----  
Mic22984 T-----TGGTTATGAAGAAGTCAAAGCTTACTGCAGTATCCATATCATTACTATTAATA  
MiACO T-----TGGTTATGAAGAAGTCAAAGCTTACTGCAGTATCCATAGTATTACTATTAATA

Mic33441 -----  
Mic18647 -AATTAATAAAATGGTTTTTCTGAAGT-AAAACAATTTAGCGCTTGTTTTGGAATTGTTTTA  
Mic23853 TATTTGAATAAAAGTTTGCAACTTTAATACAAAACAATTAATATATTGAGGACTGCT----A  
Mic23735 -----  
CsACO -----TTACCAACAATTTACAAATTTGCGGAGCCCT----G  
Mic26899 GTTT-AGTCACCG-----CCCAC--GGC--CAAGGTTTGACTTGTGACTAATGAATC  
Mic46112 -----  
Mic31832 -----  
Mic22984 ATTT-GTAGACAG-----CAACAGATGTAACATTATTTAATAATAACTAATAGACC  
MiACO ATTT-GTAGACAG-----CAACAGATGTAACATTATTTTATAATAACTAATAGACC

Mic33441 -----  
Mic18647 ATGTCTTGCTATTTACATATATCCTACTTGTAACCATGTTCAAAACTATATA--TGATT  
Mic23853 TTCTCAAGTGTTCCAAATAAAGCTAA----A----TATTTCAACAATTTGAGTCCCTTA  
Mic23735 -----  
CsACO TTGTGAACTCTTCCAGTAATTCCGA----AAAAATGTTTCAACTAATTAATAACGTA  
Mic26899 GTGTCTAAAGTGAACACGTTAACCACA----C----GGCTCTAAAGTGAGT----CGCAG  
Mic46112 -----  
Mic31832 -----  
Mic22984 TTGTCTCCCCTTCATTATTTTATATTT---T---AGATCTC-----  
MiACO TTGTCTCCCCTTCATTATTTTAAAAAA---A---AAAAAAA-----

Mic33441 -----  
Mic18647 TGTAGTCTTGATGGGTGTGTTTTGTTGAAGGA-----ATTATTTCTT  
Mic23853 ATTTCTTTCTGCAGTAGCCCTTCTGTTAACAGGAGTACTGGGTACCCCTTGATCATGGTTC  
Mic23735 -----



CsACO TGAATCGTCCAATGTTGCTCTTTACTT-----  
Mic26899 AGGAAT-----GGGTGTCCTTACGT-GTAAGACAACAACAGTACAGCGCGTTAATAAAG  
Mic46112 -----  
Mic31832 -----  
Mic22984 AGAA-----ACTGTTTCAT-----AGAAGCAACA-----AAAATGATATAAAAT  
MiACO AAAA-----

Mic33441 -----  
Mic18647 ATTTCAATGTGACAAAATAA-----  
Mic23853 TTCTTGATGCTTCCAAATACAAATTAAGATTTG--  
Mic23735 -----  
CsACO -----  
Mic26899 ACGTCCTTTATAGCAACTCTACTTAAATCTCAACC  
Mic46112 -----  
Mic31832 -----  
Mic22984 ATATCCTGGAGGGGAAATCTTG-----  
MiACO -----



**Figure S5: Expression profile of XTHs as obtained from “Dashehari” transcriptome. Illumina sequencing was performed in triplicates, data is represented as mean with  $\pm$ SE. P=0.01 for all data sets.**

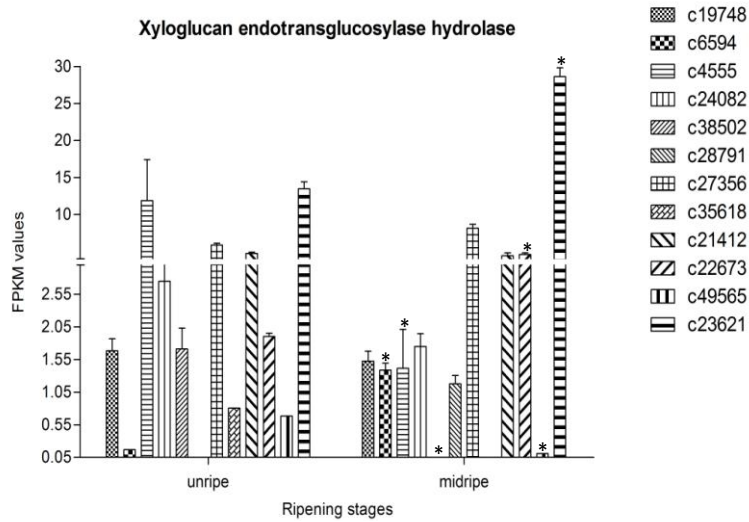

**Figure S6: Expression profile of Galactosidases as obtained from “Dashehari” transcriptome. Illumina sequencing was performed in triplicates, data is represented as mean with  $\pm$ SE. P=0.01 for all data sets.**

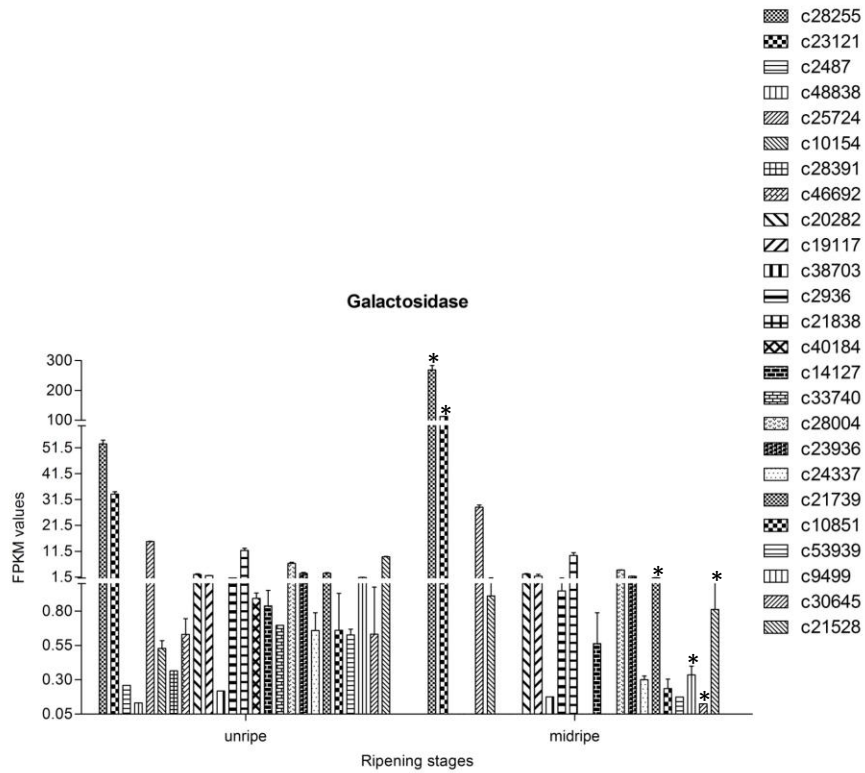

Supplementary Table S1: List of transcription factors differentially regulated in “Dashehari” Transcriptome. Statistical test method: hypergeometric test / Fisher's exact test, FDR correction method: Benjamini and Hochberg

| Transcription Factor | Contig Id | Fold Change | P-Value  | Transcription Factor | Contig Id | Fold Change | P-Value  | Transcription Factor | Contig Id | Fold Change | P-Value  |
|----------------------|-----------|-------------|----------|----------------------|-----------|-------------|----------|----------------------|-----------|-------------|----------|
| AP2                  | c20654    | 4.59        | 9.14E-06 | CO-like              | c20702    | -2.11       | 1.40E-05 | MYB                  | c13400    | 6.27        | 1.24E-09 |
| AP2                  | c20549    | 4.41        | 9.62E-10 | CO-like              | c19931    | -2.60       | 0.000109 | MYB                  | c19378    | 5.33        | 4.21E-16 |
| AP2                  | c20774    | 3.99        | 1.15E-07 | CO-like              | c46997    | -4.05       | 0.001174 | MYB                  | c12893    | 4.14        | 0.000108 |
| AP2                  | c26537    | -2.68       | 1.02E-05 |                      |           |             |          | MYB                  | c20105    | 4.11        | 1.80E-12 |
| AP2                  | c21356    | -2.77       | 6.59E-08 | CPP                  | c26259    | 2.73        | 3.01E-07 | MYB                  | c28201    | 3.74        | 1.09E-14 |
|                      |           |             |          | CPP                  | c25544    | -2.12       | 4.40E-05 | MYB                  | c28275    | 3.69        | 9.83E-12 |
| ARF                  | c26627    | 6.01        | 1.10E-07 |                      |           |             |          | MYB                  | c10187    | 3.61        | 1.43E-05 |
| ARF                  | c16595    | 2.51        | 0.000149 | DBB                  | c17666    | 3.77        | 1.32E-11 | MYB                  | c24538    | 3.61        | 1.31E-07 |
| ARF                  | c27449    | 2.46        | 1.43E-07 | DBB                  | c21156    | 2.90        | 0.0007   | MYB                  | c20754    | 3.52        | 5.59E-13 |
| ARF                  | c8037     | -2.13       | 0.007795 |                      |           |             |          | MYB                  | c19933    | 3.22        | 8.61E-05 |
| ARF                  | c14938    | -2.39       | 0.001625 | Dof                  | c15088    | 6.95        | 7.94E-18 | MYB                  | c19927    | 3.12        | 7.10E-10 |
| ARF                  | c24111    | -2.43       | 1.83E-06 | Dof                  | c26661    | 2.23        | 5.12E-06 | MYB                  | c20663    | 2.83        | 0.002193 |
| ARF                  | c17688    | -2.77       | 7.88E-09 | Dof                  | c28339    | -2.02       | 0.000222 | MYB                  | c23810    | 2.82        | 1.69E-06 |
| ARF                  | c18707    | -3.01       | 1.83E-08 | Dof                  | c20689    | -2.17       | 7.51E-06 | MYB                  | c10699    | 2.61        | 0.002324 |
| ARF                  | c40252    | -3.44       | 0.000449 | Dof                  | c18525    | -2.44       | 0.003018 | MYB                  | c26445    | 2.40        | 3.57E-06 |
| ARF                  | c14053    | -3.49       | 1.31E-08 |                      |           |             |          | MYB                  | c16305    | 2.39        | 5.34E-05 |
| ARF                  | c47020    | -4.78       | 5.64E-06 | E2F/DP               | c25808    | 4.34        | 3.78E-10 | MYB                  | c14521    | 2.31        | 1.58E-06 |
| ARF                  | c29264    | -5.34       | 2.89E-06 | E2F/DP               | c21553    | 2.99        | 3.23E-10 | MYB                  | c26971    | 2.27        | 0.003938 |
|                      |           |             |          | E2F/DP               | c26154    | 2.33        | 0.000511 | MYB                  | c16195    | 2.18        | 8.63E-05 |
| B3                   | c27331    | 3.08        | 1.41E-09 | E2F/DP               | c17040    | 2.06        | 0.00021  | MYB                  | c24559    | 2.17        | 3.25E-06 |
| B3                   | c14230    | 3.07        | 0.000148 | E2F/DP               | c28256    | -2.51       | 0.003558 | MYB                  | c19825    | -2.00       | 0.000179 |
| B3                   | c20648    | 2.93        | 1.84E-08 | E2F/DP               | c24725    | -3.28       | 0.00369  | MYB                  | c15494    | -2.02       | 0.004778 |
| B3                   | c27457    | 2.43        | 2.19E-07 | E2F/DP               | c11407    | -3.78       | 0.000475 | MYB                  | c23064    | -2.10       | 2.77E-05 |
| B3                   | c22208    | -2.04       | 2.30E-05 |                      |           |             |          | MYB                  | c22224    | -2.23       | 2.05E-05 |
| B3                   | c22402    | -2.30       | 0.003436 | ERF                  | c18034    | 4.44        | 1.80E-06 | MYB                  | c21749    | -2.47       | 6.40E-05 |
| B3                   | c27650    | -2.34       | 3.78E-05 | ERF                  | c22322    | 3.40        | 1.80E-11 | MYB                  | c20940    | -2.49       | 1.31E-07 |
| B3                   | c22349    | -2.44       | 4.90E-06 | ERF                  | c14742    | 2.54        | 0.005898 | MYB                  | c17533    | -2.50       | 1.16E-06 |
| B3                   | c26456    | -2.56       | 2.55E-05 | ERF                  | c13537    | 2.34        | 0.008966 | MYB                  | c6517     | -2.63       | 0.002346 |
| B3                   | c26537    | -2.68       | 1.02E-05 | ERF                  | c39355    | 2.24        | 0.000154 | MYB                  | c31014    | -2.68       | 0.007747 |
| B3                   | c22693    | -2.72       | 8.08E-05 | ERF                  | c26290    | 2.16        | 1.70E-05 | MYB                  | c24893    | -2.73       | 0.004014 |
| B3                   | c911      | -2.73       | 2.25E-08 | ERF                  | c16914    | -2.01       | 0.000416 | MYB                  | c17846    | -2.86       | 0.007786 |
| B3                   | c19506    | -2.78       | 2.48E-07 | ERF                  | c20423    | -2.18       | 0.000616 | MYB                  | c16899    | -2.86       | 2.04E-08 |
| B3                   | c15180    | -2.99       | 0.000704 | ERF                  | c21896    | -2.19       | 3.47E-05 | MYB                  | c22468    | -2.92       | 2.36E-07 |
| B3                   | c16940    | -3.24       | 8.55E-08 | ERF                  | c3792     | -2.25       | 0.000421 | MYB                  | c17816    | -2.96       | 9.01E-10 |
| B3                   | c18003    | -3.56       | 3.54E-08 | ERF                  | c24624    | -2.32       | 1.22E-05 | MYB                  | c11814    | -3.03       | 0.005645 |
| B3                   | c29400    | -4.30       | 0.002278 | ERF                  | c17402    | -2.34       | 0.000637 | MYB                  | c29815    | -3.09       | 0.00988  |
|                      |           |             |          | ERF                  | c26938    | -2.37       | 5.75E-07 | MYB                  | c47661    | -3.66       | 4.17E-07 |
| BBR-BPC              | c27154    | 2.17        | 0.004457 | ERF                  | c22035    | -2.42       | 8.30E-05 | MYB                  | c12114    | -3.82       | 0.000119 |
| BBR-BPC              | c22046    | -2.08       | 0.000415 | ERF                  | c16154    | -2.50       | 0.000209 | MYB                  | c49037    | -4.02       | 0.008335 |

|      |        |       |          |         |        |       |          |           |        |       |          |
|------|--------|-------|----------|---------|--------|-------|----------|-----------|--------|-------|----------|
|      |        |       |          | ERF     | c39593 | -3.00 | 0.000126 | MYB       | c14902 | -4.16 | 0.000334 |
| BES1 | c26524 | 4.19  | 1.93E-17 | ERF     | c32799 | -3.38 | 0.005117 | MYB       | c40482 | -4.33 | 0.00284  |
| BES1 | c27105 | 3.99  | 5.29E-14 | ERF     | c47790 | -3.79 | 1.79E-07 | MYB       | c29858 | -4.54 | 3.98E-06 |
| BES1 | c19792 | 2.49  | 3.96E-07 | ERF     | c15711 | -3.83 | 0.000467 | MYB       | c5847  | -4.74 | 7.67E-11 |
| BES1 | c29669 | -5.12 | 2.28E-05 | ERF     | c29357 | -3.88 | 2.79E-07 |           |        |       |          |
|      |        |       |          | ERF     | c40854 | -4.37 | 0.00023  | NAC       | c27045 | 5.33  | 7.68E-19 |
| bHLH | c13381 | 7.23  | 1.43E-13 | ERF     | c89    | -4.40 | 0.001618 | NAC       | c22341 | 2.98  | 2.68E-06 |
| bHLH | c26412 | 6.00  | 2.94E-12 |         |        |       |          | NAC       | c20364 | 2.67  | 0.003985 |
| bHLH | c14886 | 4.32  | 3.70E-14 | FAR1    | c17956 | 3.13  | 0.000237 | NAC       | c24250 | 2.33  | 0.001341 |
| bHLH | c23922 | 4.18  | 2.54E-15 | FAR1    | c27689 | 2.43  | 1.21E-06 | NAC       | c19395 | 2.04  | 0.000222 |
| bHLH | c22822 | 3.34  | 3.07E-08 | FAR1    | c26453 | 2.30  | 0.001118 | NAC       | c27697 | -2.04 | 0.000101 |
| bHLH | c25955 | 3.11  | 1.04E-07 | FAR1    | c25919 | 2.22  | 1.68E-05 | NAC       | c521   | -2.23 | 0.005115 |
| bHLH | c28218 | 3.07  | 1.04E-07 | FAR1    | c23749 | -2.02 | 0.001269 | NAC       | c35124 | -2.33 | 0.003358 |
| bHLH | c25901 | 3.05  | 1.29E-10 | FAR1    | c23329 | -2.52 | 9.31E-05 | NAC       | c19974 | -2.37 | 5.89E-06 |
| bHLH | c22992 | 3.00  | 2.32E-07 | FAR1    | c20196 | -3.63 | 8.48E-12 | NAC       | c25356 | -2.45 | 0.003021 |
| bHLH | c26099 | 2.85  | 3.17E-07 | FAR1    | c15178 | -3.86 | 8.46E-06 | NAC       | c16898 | -2.48 | 0.00643  |
| bHLH | c26695 | 2.61  | 1.94E-06 | FAR1    | c19341 | -4.33 | 6.23E-17 | NAC       | c13037 | -2.62 | 0.000954 |
| bHLH | c26084 | 2.60  | 0.002489 | FAR1    | c12712 | -4.45 | 1.74E-09 | NAC       | c19293 | -2.83 | 9.17E-06 |
| bHLH | c16210 | 2.56  | 7.57E-07 | FAR1    | c7573  | -5.43 | 4.40E-08 | NAC       | c25333 | -2.93 | 1.25E-06 |
| bHLH | c26383 | 2.34  | 0.005863 |         |        |       |          | NAC       | c30275 | -3.13 | 0.000298 |
| bHLH | c17722 | 2.27  | 9.73E-07 | G2-like | c27805 | 4.14  | 1.85E-16 | NAC       | c4064  | -3.14 | 0.000817 |
| bHLH | c26766 | 2.25  | 0.000131 | G2-like | c23959 | 2.37  | 1.67E-06 | NAC       | c19370 | -3.21 | 3.66E-05 |
| bHLH | c24970 | 2.21  | 2.03E-05 | G2-like | c23223 | -2.03 | 0.000772 | NAC       | c7377  | -3.32 | 0.000726 |
| bHLH | c20917 | 2.03  | 0.000168 | G2-like | c23771 | -2.11 | 0.009584 | NAC       | c45344 | -4.21 | 0.002099 |
| bHLH | c25979 | -2.05 | 0.000155 | G2-like | c25640 | -2.39 | 7.13E-05 | NAC       | c40356 | -4.23 | 8.01E-05 |
| bHLH | c17021 | -2.14 | 1.02E-05 | G2-like | c25035 | -2.68 | 6.68E-08 | NAC       | c47605 | -4.79 | 0.000126 |
| bHLH | c16739 | -2.17 | 2.74E-05 | G2-like | c20531 | -2.69 | 1.43E-08 | NAC       | c2209  | -5.76 | 6.75E-05 |
| bHLH | c19647 | -2.25 | 7.96E-06 | G2-like | c14782 | -3.16 | 1.17E-09 |           |        |       |          |
| bHLH | c17525 | -2.38 | 0.000677 | G2-like | c22084 | -3.42 | 7.26E-11 | NF-YA     | c15427 | 4.03  | 7.90E-07 |
| bHLH | c48802 | -2.44 | 0.002172 | G2-like | c11284 | -4.00 | 0.008421 | NF-YB     | c24426 | -2.45 | 1.07E-05 |
| bHLH | c15810 | -2.51 | 0.00146  | G2-like | c5885  | -4.64 | 1.19E-08 | NF-YB     | c27034 | -2.63 | 0.000119 |
| bHLH | c30995 | -2.56 | 0.002951 | G2-like | c19857 | -5.31 | 1.48E-14 | NF-YB     | c27566 | -3.07 | 2.22E-10 |
| bHLH | c15050 | -2.56 | 1.18E-05 |         |        |       |          |           |        |       |          |
| bHLH | c24379 | -2.77 | 2.17E-05 | GATA    | c24160 | 3.16  | 1.42E-10 | Nin-like  | c17891 | -2.54 | 4.11E-06 |
| bHLH | c31267 | -2.86 | 0.000286 | GATA    | c24595 | 3.03  | 8.65E-09 | Nin-like  | c9823  | -3.54 | 0.000128 |
| bHLH | c39894 | -2.87 | 0.000283 | GATA    | c21351 | 2.22  | 4.58E-06 |           |        |       |          |
| bHLH | c13442 | -3.07 | 0.001808 | GATA    | c15195 | -3.10 | 8.77E-05 | S1Fa-like | c15124 | 3.04  | 0.000236 |
| bHLH | c13182 | -3.14 | 0.000766 | GATA    | c48183 | -3.91 | 0.000427 | S1Fa-like | c17182 | 2.31  | 0.00417  |
| bHLH | c23082 | -3.16 | 4.90E-09 |         |        |       |          | S1Fa-like | c17488 | -2.16 | 8.86E-05 |
| bHLH | c20604 | -3.25 | 0.007869 | GeBP    | c22960 | 2.54  | 6.92E-07 | S1Fa-like | c18033 | -2.16 | 0.001128 |
| bHLH | c17726 | -3.28 | 0.000808 | GeBP    | c17211 | 2.02  | 3.76E-05 | S1Fa-like | c16436 | -2.22 | 0.003601 |
| bHLH | c13973 | -3.30 | 2.81E-05 | GeBP    | c12761 | -2.32 | 0.002023 | S1Fa-like | c12808 | -2.37 | 0.001783 |
| bHLH | c7801  | -3.43 | 0.002814 | GeBP    | c20169 | -2.68 | 0.002979 | S1Fa-like | c12831 | -3.23 | 0.001284 |
| bHLH | c23522 | -3.50 | 6.90E-06 | GeBP    | c48774 | -3.12 | 0.000978 | S1Fa-like | c19511 | -4.18 | 7.92E-11 |
| bHLH | c11372 | -3.52 | 0.001108 | GeBP    | c14779 | -3.88 | 0.008991 |           |        |       |          |
| bHLH | c9639  | -4.12 | 4.50E-08 |         |        |       |          | SBP       | c28298 | 3.54  | 0.004735 |

|      |        |       |          |          |        |       |          |          |        |       |          |
|------|--------|-------|----------|----------|--------|-------|----------|----------|--------|-------|----------|
| bHLH | c39202 | -4.38 | 0.002178 | GRAS     | c18816 | 2.59  | 1.48E-05 | SBP      | c16882 | 2.81  | 4.11E-06 |
| bHLH | c12911 | -4.57 | 4.31E-08 | GRAS     | c26439 | -2.15 | 0.009287 | SBP      | c26136 | 2.14  | 2.36E-05 |
|      |        |       |          | GRAS     | c3690  | -2.31 | 0.003408 | SBP      | c23631 | -2.06 | 0.000112 |
| bZIP | c19260 | 5.13  | 1.28E-12 | GRAS     | c18601 | -2.39 | 0.007934 | SBP      | c21236 | -2.08 | 0.008088 |
| bZIP | c28930 | 4.70  | 0.001029 | GRAS     | c47477 | -4.11 | 1.28E-05 | SBP      | c14207 | -2.78 | 5.48E-05 |
| bZIP | c16021 | 3.99  | 0.00067  |          |        |       |          | SBP      | c19391 | -3.23 | 2.97E-06 |
| bZIP | c26902 | 3.64  | 1.22E-13 | GRF      | c9750  | -3.21 | 6.18E-05 | SBP      | c19199 | -3.28 | 1.89E-06 |
| bZIP | c12658 | 2.39  | 0.007156 |          |        |       |          | SBP      | c25157 | -3.29 | 1.24E-11 |
| bZIP | c18448 | 2.30  | 0.005522 | HB-other | c23711 | 6.08  | 1.95E-19 | SBP      | c37921 | -3.69 | 0.00038  |
| bZIP | c16810 | 2.26  | 0.00098  |          |        |       |          | SBP      | c21031 | -4.01 | 0.008855 |
| bZIP | c18188 | 2.22  | 2.35E-05 | HD-ZIP   | c27147 | 7.80  | 4.75E-39 | SBP      | c6332  | -4.34 | 1.84E-05 |
| bZIP | c47027 | -2.35 | 0.002336 | HD-ZIP   | c21799 | 2.67  | 1.58E-07 |          |        |       |          |
| bZIP | c38886 | -2.43 | 0.002194 | HD-ZIP   | c15099 | 2.22  | 0.000302 | SRS      | c27836 | -2.67 | 2.65E-08 |
| bZIP | c27674 | -2.88 | 1.94E-09 | HD-ZIP   | c242   | 2.09  | 0.000733 | SRS      | c38539 | -3.96 | 6.20E-07 |
| bZIP | c21681 | -3.00 | 0.000996 | HD-ZIP   | c18610 | -2.15 | 0.001787 | SRS      | c15078 | -4.13 | 9.43E-05 |
| bZIP | c22945 | -3.04 | 2.11E-08 | HD-ZIP   | c21215 | -3.42 | 0.000814 | SRS      | c25337 | -4.41 | 2.98E-14 |
| bZIP | c4943  | -3.33 | 0.000283 | HD-ZIP   | c18876 | -4.06 | 8.10E-07 | SRS      | c12997 | -4.69 | 0.000442 |
| bZIP | c25943 | -3.82 | 1.57E-13 | HD-ZIP   | c36147 | -5.23 | 0.001444 |          |        |       |          |
| bZIP | c16361 | -3.91 | 0.002139 |          |        |       |          | TALE     | c22649 | -2.35 | 7.51E-07 |
| bZIP | c3708  | -3.97 | 0.000626 | HSF      | c22315 | 6.04  | 7.16E-24 |          |        |       |          |
| bZIP | c3742  | -4.72 | 1.32E-08 | HSF      | c19819 | 5.32  | 2.52E-12 | TCP      | c16404 | 3.37  | 4.82E-06 |
| bZIP | c37802 | -4.81 | 0.006561 | HSF      | c13753 | 4.42  | 2.66E-08 | TCP      | c25966 | 2.67  | 6.15E-07 |
| bZIP | c17489 | -4.91 | 1.09E-11 | HSF      | c22946 | 3.54  | 7.86E-05 | TCP      | c17077 | 2.28  | 9.48E-06 |
|      |        |       |          | HSF      | c25935 | 2.67  | 1.68E-08 | TCP      | c18280 | -2.06 | 0.00263  |
| C2H2 | c1743  | 4.89  | 0.000297 | HSF      | c12716 | 2.66  | 7.71E-05 | TCP      | c49619 | -2.36 | 0.004143 |
| C2H2 | c26690 | 4.45  | 0.003527 | HSF      | c48447 | 2.56  | 0.000348 | TCP      | c20629 | -2.85 | 0.007794 |
| C2H2 | c26324 | 4.20  | 4.97E-12 | HSF      | c28136 | 2.52  | 0.000955 | TCP      | c14129 | -3.37 | 4.59E-08 |
| C2H2 | c26506 | 4.19  | 1.57E-08 | HSF      | c12474 | 2.39  | 0.007883 | TCP      | c17023 | -3.40 | 1.03E-05 |
| C2H2 | c24402 | 2.94  | 3.97E-06 | HSF      | c15168 | 2.16  | 6.23E-06 | TCP      | c15361 | -3.56 | 4.87E-05 |
| C2H2 | c7129  | 2.76  | 0.000348 | HSF      | c23401 | 2.10  | 5.83E-06 | TCP      | c21230 | -4.05 | 0.005961 |
| C2H2 | c22052 | 2.60  | 5.75E-08 | HSF      | c27347 | -2.10 | 8.75E-06 | TCP      | c12727 | -4.84 | 0.00885  |
| C2H2 | c9678  | -2.11 | 0.007163 | HSF      | c14611 | -2.37 | 3.25E-06 |          |        |       |          |
| C2H2 | c16603 | -2.48 | 4.72E-05 | HSF      | c20763 | -2.41 | 0.000172 | Trihelix | c25016 | 2.07  | 5.49E-05 |
| C2H2 | c23304 | -2.68 | 0.000787 | HSF      | c23628 | -2.50 | 0.006359 | Trihelix | c18144 | -2.66 | 4.58E-07 |
| C2H2 | c18254 | -3.06 | 5.80E-08 | HSF      | c38784 | -2.54 | 0.007945 | Trihelix | c9983  | -3.16 | 0.000318 |
| C2H2 | c14072 | -3.20 | 1.45E-06 | HSF      | c20594 | -2.63 | 1.27E-05 |          |        |       |          |
| C2H2 | c14527 | -3.30 | 0.000176 | HSF      | c11148 | -2.80 | 2.30E-07 | VOZ      | c27207 | 2.23  | 2.23E-06 |
| C2H2 | c16052 | -3.70 | 3.23E-08 | HSF      | c11260 | -2.84 | 1.17E-05 |          |        |       |          |
| C2H2 | c49298 | -3.97 | 8.87E-05 | HSF      | c22092 | -3.71 | 7.12E-14 | WRKY     | c19116 | 4.27  | 7.73E-05 |
| C2H2 | c15820 | -4.45 | 0.000966 | HSF      | c17282 | -3.89 | 9.33E-10 | WRKY     | c24262 | 4.03  | 5.52E-07 |
|      |        |       |          | HSF      | c9865  | -4.51 | 5.23E-08 | WRKY     | c24607 | 3.86  | 1.05E-12 |
| C3H  | c27394 | 6.27  | 3.57E-09 | HSF      | c23695 | -5.00 | 2.00E-16 | WRKY     | c21459 | 3.55  | 0.004002 |
| C3H  | c26607 | 5.99  | 7.72E-12 | HSF      | c9739  | -5.33 | 1.47E-07 | WRKY     | c24824 | 3.26  | 4.64E-11 |
| C3H  | c27115 | 5.99  | 3.37E-08 |          |        |       |          | WRKY     | c29033 | 2.13  | 0.00928  |
| C3H  | c38016 | 5.58  | 7.63E-14 | LBD      | c22818 | 3.94  | 2.19E-09 | WRKY     | c19104 | 2.05  | 0.000295 |
| C3H  | c20086 | 4.63  | 4.80E-09 | LBD      | c12652 | 3.50  | 8.19E-13 | WRKY     | c15826 | -2.16 | 0.000525 |

|       |        |       |          |        |        |       |          |       |        |       |          |
|-------|--------|-------|----------|--------|--------|-------|----------|-------|--------|-------|----------|
| C3H   | c19011 | 4.36  | 1.77E-06 | LBD    | c25564 | 2.92  | 3.47E-05 | WRKY  | c24766 | -2.20 | 9.86E-05 |
| C3H   | c17885 | 3.20  | 4.93E-08 | LBD    | c20944 | 2.79  | 6.12E-06 | WRKY  | c14499 | -2.56 | 5.98E-06 |
| C3H   | c20588 | 2.84  | 0.001595 | LBD    | c18705 | 2.03  | 1.73E-05 | WRKY  | c11420 | -2.82 | 0.001501 |
| C3H   | c24932 | 2.67  | 5.82E-06 | LBD    | c18893 | -2.70 | 0.000152 | WRKY  | c39468 | -2.91 | 2.81E-05 |
| C3H   | c28054 | -2.10 | 1.04E-05 | LBD    | c7897  | -2.94 | 0.000163 | WRKY  | c15910 | -2.98 | 1.39E-09 |
| C3H   | c5074  | -3.54 | 0.008088 | LBD    | c15466 | -3.92 | 6.68E-06 | WRKY  | c37886 | -3.49 | 9.29E-05 |
| C3H   | c29409 | -3.57 | 4.27E-07 |        |        |       |          | WRKY  | c9120  | -3.57 | 0.000836 |
| C3H   | c20385 | -3.77 | 1.30E-08 | MIKC   | c24309 | -2.00 | 0.001044 | WRKY  | c7032  | -3.67 | 7.53E-08 |
| C3H   | c25387 | -3.87 | 4.56E-14 | MIKC   | c17204 | -2.89 | 3.58E-09 | WRKY  | c12489 | -3.85 | 0.004003 |
| C3H   | c49580 | -5.01 | 5.39E-05 | MIKC   | c7819  | -5.34 | 0.000987 | WRKY  | c4638  | -3.97 | 8.01E-05 |
|       |        |       |          |        |        |       |          | WRKY  | c40182 | -4.19 | 0.002131 |
| CAMTA | c39879 | -2.75 | 0.000518 | M-type | c14662 | 3.98  | 0.009274 | WRKY  | c14531 | -4.68 | 4.54E-07 |
| CAMTA | c37861 | -3.72 | 7.35E-06 | M-type | c27307 | 3.48  | 7.40E-13 | WRKY  | c7649  | -4.80 | 3.07E-07 |
| CAMTA | c47090 | -4.24 | 0.003132 | M-type | c14628 | -2.68 | 0.0006   | WRKY  | c44035 | -5.41 | 0.000511 |
| CAMTA | c7320  | -4.37 | 3.24E-07 | M-type | c22970 | -3.12 | 2.33E-10 | WRKY  | c14607 | -6.63 | 6.12E-30 |
|       |        |       |          | M-type | c18938 | -4.02 | 7.94E-13 |       |        |       |          |
|       |        |       |          | M-type | c29112 | -5.13 | 5.09E-09 | ZF-HD | c25550 | -1.83 | 0.00026  |
|       |        |       |          |        |        |       |          | ZF-HD | c3851  | -3.67 | 0.009217 |

**Supplementary table S2: Pathway enrichment against Arabidopsis**

| <b>#Term</b>                                             | <b>Database</b> | <b>ID</b>           | <b>Input number</b> | <b>Background number</b> | <b>P-Value 0.1</b> |
|----------------------------------------------------------|-----------------|---------------------|---------------------|--------------------------|--------------------|
| glutathione-mediated detoxification II                   | BioCyc          | PWY-6842            | 5                   | 70                       | 0.000192           |
| S-adenosyl-L-methionine cycle II                         | BioCyc          | PWY-5041            | 3                   | 23                       | 0.00082            |
| jasmonic acid biosynthesis                               | BioCyc          | PWY-735             | 3                   | 33                       | 0.00214            |
| Phenylpropanoid biosynthesis                             | KEGG PATHWAY    | ath00940            | 7                   | 201                      | 0.002339           |
| 2-oxoglutarate decarboxylation to succinyl-CoA           | BioCyc          | PWY-5084            | 2                   | 9                        | 0.002688           |
| Glutathione metabolism                                   | KEGG PATHWAY    | ath00480            | 5                   | 114                      | 0.0039             |
| alpha-Linolenic acid metabolism                          | KEGG PATHWAY    | ath00592            | 3                   | 39                       | 0.005853           |
| S-adenosyl-L-methionine biosynthesis                     | BioCyc          | SAM-PWY             | 2                   | 15                       | 0.006465           |
| ethylene biosynthesis I (plants)                         | BioCyc          | ETHYL-PWY           | 2                   | 20                       | 0.010731           |
| methionine degradation I (to homocysteine)               | BioCyc          | METHIONINE-DEG1-PWY | 2                   | 20                       | 0.010731           |
| Yang cycle                                               | BioCyc          | PWY-7270            | 2                   | 25                       | 0.015934           |
| pyridine nucleotide cycling (plants)                     | BioCyc          | PWY-5381            | 2                   | 25                       | 0.015934           |
| betanidin degradation                                    | BioCyc          | PWY-5461            | 3                   | 91                       | 0.029949           |
| baicalein degradation (hydrogen peroxide detoxification) | BioCyc          | PWY-7214            | 3                   | 91                       | 0.029949           |
| Phenylalanine biosynthesis                               | PANTHER         | P02765              | 1                   | 8                        | 0.041622           |
| glutamate biosynthesis II                                | BioCyc          | GLUTAMATE-SYN2-PWY  | 1                   | 5                        | 0.042423           |
| glutamate degradation I                                  | BioCyc          | GLUTAMATE-DEG1-PWY  | 1                   | 5                        | 0.042423           |
| Plant-pathogen interaction                               | KEGG PATHWAY    | ath04626            | 5                   | 214                      | 0.043299           |
| Calvin-Benson-Bassham cycle                              | BioCyc          | CALVIN-PWY          | 2                   | 47                       | 0.04828            |
| Phenylalanine metabolism                                 | KEGG PATHWAY    | ath00360            | 4                   | 155                      | 0.050933           |
| Carbon fixation in photosynthetic organisms              | KEGG PATHWAY    | ath00710            | 3                   | 94                       | 0.053298           |
| glutamate biosynthesis III                               | BioCyc          | GLUTSYNIII-PWY      | 1                   | 7                        | 0.056167           |
| thiosulfate disproportionation III (rhodanese)           | BioCyc          | PWY-5350            | 1                   | 8                        | 0.062966           |
| alanine degradation II (to D-lactate)                    | BioCyc          | ALACAT2-PWY         | 1                   | 8                        | 0.062966           |
| glutamate degradation IV                                 | BioCyc          | PWY-4321            | 1                   | 8                        | 0.062966           |
| trehalose biosynthesis I                                 | BioCyc          | TRESYN-PWY          | 1                   | 8                        | 0.062966           |
| Glutamine glutamate conversion                           | PANTHER         | P02745              | 1                   | 14                       | 0.068592           |
| coumarin biosynthesis (via 2-coumarate)                  | BioCyc          | PWY-5176            | 2                   | 58                       | 0.069134           |
| oxygenic photosynthesis                                  | BioCyc          | PHOTOALL-PWY        | 2                   | 59                       | 0.071155           |
| gluconeogenesis I                                        | BioCyc          | GLUCONEO-           | 2                   | 59                       | 0.071155           |



|                                                                     |              | PWY                  |   |     |          |
|---------------------------------------------------------------------|--------------|----------------------|---|-----|----------|
| superpathway of polyamine biosynthesis                              | BioCyc       | PWYQT-94             | 1 | 12  | 0.089682 |
| phenylalanine biosynthesis II                                       | BioCyc       | PWY-3462             | 1 | 12  | 0.089682 |
| Plant hormone signal transduction                                   | KEGG PATHWAY | ath04075             | 6 | 355 | 0.097157 |
| anthocyanin biosynthesis (cyanidin 3-O-glucoside)                   | BioCyc       | PWY-5125             | 1 | 14  | 0.102758 |
| arginine biosynthesis IV                                            | BioCyc       | ARGININE-SYN4-PWY    | 1 | 14  | 0.102758 |
| superpathway of phenylalanine and tyrosine biosynthesis             | BioCyc       | PWY-3481             | 1 | 14  | 0.102758 |
| Degradation of aromatic compounds                                   | KEGG PATHWAY | ath01220             | 1 | 12  | 0.108039 |
| Cytoskeletal regulation by Rho GTPase                               | PANTHER      | P00016               | 1 | 24  | 0.112189 |
| Alanine, aspartate and glutamate metabolism                         | KEGG PATHWAY | ath00250             | 2 | 66  | 0.119378 |
| methionine biosynthesis II                                          | BioCyc       | PWY-702              | 1 | 17  | 0.122026 |
| Cysteine and methionine metabolism                                  | KEGG PATHWAY | ath00270             | 3 | 138 | 0.126331 |
| linoleate biosynthesis I (plants)                                   | BioCyc       | PWY-5995             | 1 | 19  | 0.134645 |
| Taurine and hypotaurine metabolism                                  | KEGG PATHWAY | ath00430             | 1 | 16  | 0.138892 |
| Cyanoamino acid metabolism                                          | KEGG PATHWAY | ath00460             | 2 | 73  | 0.139955 |
| seleno-amino acid biosynthesis                                      | BioCyc       | PWY-6936             | 1 | 24  | 0.165416 |
| photorespiration                                                    | BioCyc       | PWY-181              | 1 | 24  | 0.165416 |
| Starch and sucrose metabolism                                       | KEGG PATHWAY | ath00500             | 4 | 244 | 0.172657 |
| Selenocompound metabolism                                           | KEGG PATHWAY | ath00450             | 1 | 21  | 0.175973 |
| Butanoate metabolism                                                | KEGG PATHWAY | ath00650             | 1 | 22  | 0.183197 |
| Biosynthesis of amino acids                                         | KEGG PATHWAY | ath01230             | 5 | 339 | 0.183623 |
| Huntington disease                                                  | PANTHER      | P00029               | 1 | 51  | 0.221804 |
| superpathway of lysine, threonine and methionine biosynthesis II    | BioCyc       | PWY-724              | 1 | 35  | 0.229373 |
| Photosynthesis - antenna proteins                                   | KEGG PATHWAY | ath00196             | 1 | 30  | 0.238773 |
| Arginine and proline metabolism                                     | KEGG PATHWAY | ath00330             | 2 | 105 | 0.240686 |
| Flavonoid biosynthesis                                              | KEGG PATHWAY | ath00941             | 1 | 32  | 0.252071 |
| Ubiquitin proteasome pathway                                        | PANTHER      | P00060               | 1 | 61  | 0.259536 |
| superpathway of phenylalanine, tyrosine and tryptophan biosynthesis | BioCyc       | COMPLETE-ARO-ARA-PWY | 1 | 41  | 0.262201 |
| Rubisco shunt                                                       | BioCyc       | PWY-5723             | 1 | 45  | 0.283317 |
| Biosynthesis of unsaturated fatty acids                             | KEGG PATHWAY | ath01040             | 1 | 43  | 0.321196 |
| Ubiquinone and other terpenoid-quinone biosynthesis                 | KEGG PATHWAY | ath00130             | 1 | 43  | 0.321196 |
| glycolysis I (from glucose-6P)                                      | BioCyc       | GLYCOLYSIS           | 1 | 54  | 0.328679 |

|                                                                                     |              |           |    |     |          |
|-------------------------------------------------------------------------------------|--------------|-----------|----|-----|----------|
| glycolysis II (from fructose-6P)                                                    | BioCyc       | PWY-5484  | 1  | 55  | 0.333541 |
| glycolysis IV (plant cytosol)                                                       | BioCyc       | PWY-1042  | 1  | 56  | 0.338369 |
| Biosynthesis of secondary metabolites                                               | KEGG PATHWAY | ath01110  | 13 | ### | 0.339905 |
| beta-Alanine metabolism                                                             | KEGG PATHWAY | ath00410  | 1  | 50  | 0.361846 |
| glycolysis VI (metazoan)                                                            | BioCyc       | PWY66-400 | 1  | 61  | 0.361996 |
| Metabolic pathways                                                                  | KEGG PATHWAY | ath01100  | 23 | ### | 0.373225 |
| Nitrogen metabolism                                                                 | KEGG PATHWAY | ath00910  | 1  | 54  | 0.383981 |
| Fructose and mannose metabolism                                                     | KEGG PATHWAY | ath00051  | 1  | 63  | 0.43104  |
| SNARE interactions in vesicular transport                                           | KEGG PATHWAY | ath04130  | 1  | 69  | 0.460414 |
| Stilbenoid, diarylheptanoid and gingerol biosynthesis                               | KEGG PATHWAY | ath00945  | 1  | 73  | 0.479156 |
| Ubiquitin mediated proteolysis                                                      | KEGG PATHWAY | ath04120  | 2  | 183 | 0.48348  |
| Carbon metabolism                                                                   | KEGG PATHWAY | ath01200  | 3  | 309 | 0.516723 |
| Phenylalanine, tyrosine and tryptophan biosynthesis                                 | KEGG PATHWAY | ath00400  | 1  | 84  | 0.527434 |
| superpathway of cytosolic glycolysis (plants), pyruvate dehydrogenase and TCA cycle | BioCyc       | PWY-5464  | 1  | 105 | 0.537142 |
| Fatty acid metabolism                                                               | KEGG PATHWAY | ath01212  | 1  | 88  | 0.543866 |
| Inositol phosphate metabolism                                                       | KEGG PATHWAY | ath00562  | 1  | 88  | 0.543866 |
| Glyoxylate and dicarboxylate metabolism                                             | KEGG PATHWAY | ath00630  | 1  | 94  | 0.567459 |
| superpathway of anaerobic sucrose degradation                                       | BioCyc       | PWY-7345  | 1  | 125 | 0.600188 |
| Pyruvate metabolism                                                                 | KEGG PATHWAY | ath00620  | 1  | 111 | 0.627932 |
| RNA degradation                                                                     | KEGG PATHWAY | ath03018  | 1  | 129 | 0.68284  |
| Glycolysis / Gluconeogenesis                                                        | KEGG PATHWAY | ath00010  | 1  | 136 | 0.701952 |
| Endocytosis                                                                         | KEGG PATHWAY | ath04144  | 1  | 137 | 0.704588 |
| Protein processing in endoplasmic reticulum                                         | KEGG PATHWAY | ath04141  | 2  | 295 | 0.737294 |
| RNA transport                                                                       | KEGG PATHWAY | ath03013  | 1  | 220 | 0.858986 |
| Ribosome                                                                            | KEGG PATHWAY | ath03010  | 2  | 473 | 0.923802 |

**Supplementary table S3: Contigs related to flavour and colour from “Dashehari” transcriptome**

| Contig_ID     | average DOI_FPKM | average D3I_FPKM | log2_foldchange | Gene Description                                                                            |
|---------------|------------------|------------------|-----------------|---------------------------------------------------------------------------------------------|
| c13381_g1_i1  | 0.033268         | 5.448277         | 7.227558        | abscisic acid 8'-hydroxylase 1-like [Citrus sinensis]                                       |
| c27658_g4_i2  | 22.2182          | 497.4491         | 4.397324        | putative 9-cis-epoxycarotenoid dioxygenase 3 [Citrus sinensis]                              |
| c27658_g4_i1  | 18.55559         | 329.0084         | 4.061596        | putative 9-cis-epoxycarotenoid dioxygenase 3 [Citrus sinensis]                              |
| c27119_g1_i8  | 4.405029         | 63.70008         | 3.77005         | phytoene synthase, partial [Mangifera indica]                                               |
| c27119_g1_i6  | 3.51921          | 49.87668         | 3.741061        | phytoene synthase, partial [Mangifera indica]                                               |
| c27119_g1_i4  | 11.22784         | 141.3238         | 3.567338        | phytoene synthase [Mangifera indica]                                                        |
| c27119_g1_i5  | 10.37392         | 129.5139         | 3.555545        | phytoene synthase [Mangifera indica]                                                        |
| c27119_g1_i10 | 6.618453         | 82.53351         | 3.552361        | phytoene synthase [Mangifera indica]                                                        |
| c27119_g1_i3  | 3.694458         | 45.60439         | 3.531677        | phytoene synthase [Mangifera indica]                                                        |
| c27119_g1_i1  | 8.083365         | 98.42721         | 3.517494        | phytoene synthase [Mangifera indica]                                                        |
| c27119_g1_i9  | 7.449599         | 86.88154         | 3.455692        | phytoene synthase [Mangifera indica]                                                        |
| c11221_g1_i1  | 0                | 2.987052         | 2.838529        | beta-carotene hydroxylase [Citrus sinensis]                                                 |
| c12919_g1_i1  | 0.143401         | 0.923558         | 2.628528        | PREDICTED: carotenoid 9,10(9',10')-cleavage dioxygenase 1-like [Citrus sinensis]            |
| c27119_g1_i7  | 0.501687         | 2.973282         | 2.473295        | phytoene synthase, partial [Mangifera indica]                                               |
| c27119_g1_i2  | 0.590074         | 3.273474         | 2.37304         | phytoene synthase, partial [Mangifera indica]                                               |
| c17148_g1_i1  | 0.321883         | 1.599115         | 2.206307        | chalcone synthase [Rhus chinensis]                                                          |
| c17148_g1_i2  | 2.365269         | 10.23547         | 2.021087        | chalcone synthases-1 [Mangifera indica]                                                     |
| c24941_g2_i1  | 26.74776         | 85.64991         | 1.591892        | beta-carotene hydroxylase [Carica papaya]                                                   |
| c19583_g2_i1  | 20.09095         | 56.61051         | 1.407067        | PREDICTED: leucoanthocyanidin reductase-like [Citrus sinensis]                              |
| c36578_g1_i1  | 0.318236         | 0                | 1.339231        | lycopene epsilon cyclase [Citrus maxima]                                                    |
| c19583_g1_i1  | 1.063247         | 2.857554         | 1.331014        | PREDICTED: leucoanthocyanidin reductase-like [Citrus sinensis]                              |
| c723_g1_i1    | 0.140308         | 0                | 1.312726        | chalcone isomerase [Rhus chinensis]                                                         |
| c23384_g1_i2  | 6.011364         | 15.00728         | 1.232291        | violaxanthin de-epoxidase [Citrus sinensis]                                                 |
| c24759_g6_i1  | 8.411842         | 20.03696         | 1.157457        | PREDICTED: phytoene dehydrogenase, chloroplastic/chromoplastic isoform X2 [Citrus sinensis] |
| c23384_g1_i1  | 7.236825         | 17.14559         | 1.156587        | violaxanthin de-epoxidase [Citrus sinensis]                                                 |
| c24759_g6_i2  | 5.922667         | 13.23694         | 1.06368         | phytoene desaturase, partial [Manihot esculenta]                                            |

|              |          |          |          |                                                                                                      |
|--------------|----------|----------|----------|------------------------------------------------------------------------------------------------------|
| c8213_g1_i1  | 0        | 0.917503 | 1.04733  | beta-carotene hydroxylase [ <i>Carica papaya</i> ]                                                   |
| c27000_g1_i6 | 0.895857 | 1.368048 | 0.518151 | Chalcone-flavanone isomerase family protein isoform 3 [ <i>Theobroma cacao</i> ]                     |
| c24744_g1_i2 | 19.87391 | 29.33094 | 0.475203 | zeta-carotene desaturase [ <i>Citrus unshiu</i> ]                                                    |
| c27429_g1_i6 | 12.99061 | 18.68446 | 0.437437 | PREDICTED: carotenoid 9,10(9',10')-cleavage dioxygenase 1-like [ <i>Citrus sinensis</i> ]            |
| c22798_g1_i1 | 8.97822  | 12.20959 | 0.3528   | PREDICTED: prolycopene isomerase, chloroplastic isoform X1 [ <i>Citrus sinensis</i> ]                |
| c24744_g1_i3 | 14.9935  | 18.6771  | 0.22779  | zeta-carotene desaturase [ <i>Citrus unshiu</i> ]                                                    |
| c27429_g1_i1 | 2.095103 | 2.414979 | 0.096728 | 9-cis-epoxycarotenoid dioxygenase [ <i>Castanea mollissima</i> ]                                     |
| c39008_g1_i1 | 0        | 0.37646  | -0.0054  | PREDICTED: chalcone synthase [ <i>Malus domestica</i> ]                                              |
| c29453_g1_i1 | 0.866233 | 0        | -0.08885 | abscisic acid 8'-hydroxylase 3 [ <i>Arabidopsis thaliana</i> ]                                       |
| c24320_g1_i1 | 0.188805 | 0.174696 | -0.17404 | PREDICTED: leucoanthocyanidin dioxygenase-like isoform X1 [ <i>Citrus sinensis</i> ]                 |
| c24320_g1_i2 | 0.18943  | 0.174842 | -0.17613 | PREDICTED: leucoanthocyanidin dioxygenase-like isoform X1 [ <i>Citrus sinensis</i> ]                 |
| c24320_g1_i3 | 0.190947 | 0.176241 | -0.17613 | PREDICTED: leucoanthocyanidin dioxygenase-like isoform X1 [ <i>Citrus sinensis</i> ]                 |
| c27429_g1_i2 | 47.8327  | 39.78068 | -0.35133 | PREDICTED: carotenoid 9,10(9',10')-cleavage dioxygenase 1-like [ <i>Citrus sinensis</i> ]            |
| c27429_g1_i3 | 58.34967 | 47.22039 | -0.38961 | PREDICTED: carotenoid 9,10(9',10')-cleavage dioxygenase 1-like [ <i>Citrus sinensis</i> ]            |
| c25999_g1_i1 | 3.812721 | 3.047875 | -0.40491 | Violaxanthin de-epoxidase-related [ <i>Theobroma cacao</i> ]                                         |
| c16003_g2_i1 | 0        | 0.334472 | -0.49515 | PREDICTED: carotenoid 9,10(9',10')-cleavage dioxygenase 1-like isoform X2 [ <i>Citrus sinensis</i> ] |
| c27658_g2_i2 | 14.19335 | 10.21634 | -0.55257 | Nine-cis-epoxycarotenoid dioxygenase 3 [ <i>Theobroma cacao</i> ]                                    |
| c14054_g1_i1 | 2.45272  | 1.732768 | -0.59182 | Nine-cis-epoxycarotenoid dioxygenase 4 [ <i>Theobroma cacao</i> ]                                    |
| c25999_g1_i2 | 4.503446 | 3.160643 | -0.59726 | Violaxanthin de-epoxidase-related [ <i>Theobroma cacao</i> ]                                         |
| c31038_g1_i1 | 0.907675 | 0.624953 | -0.65986 | anthocyanidin 5,3-O-glucosyltransferase-like                                                         |
| c19638_g2_i1 | 11.45054 | 7.373131 | -0.72555 | Leucoanthocyanidin reductase family protein                                                          |
| c20878_g1_i1 | 6.179518 | 3.67217  | -0.83147 | anthocyanidin 5,3-O-glucosyltransferase-like                                                         |
| c11756_g1_i1 | 7.07433  | 3.565891 | -1.07576 | phytoene synthase [ <i>Mangifera indica</i> ]                                                        |
| c24320_g1_i4 | 0.161165 | 0.073825 | -1.18243 | PREDICTED: leucoanthocyanidin dioxygenase-like isoform X1 [ <i>Citrus sinensis</i> ]                 |
| c48392_g1_i1 | 0.606417 | 0.277782 | -1.18243 | abscisic acid 8'-hydroxylase 3 [ <i>Arabidopsis thaliana</i> ]                                       |
| c1082_g1_i1  | 2.379913 | 1.023636 | -1.298   | phytoene synthase, partial [ <i>Mangifera indica</i> ]                                               |
| c16268_g1_i1 | 0        | 0.125108 | -1.49515 | PREDICTED: leucoanthocyanidin reductase-like [ <i>Citrus sinensis</i> ]                              |

|              |          |          |          |                                                                                       |
|--------------|----------|----------|----------|---------------------------------------------------------------------------------------|
| c15972_g1_i3 | 0.643163 | 0.23675  | -1.52273 | PREDICTED: abscisic acid 8'-hydroxylase 3-like [Glycine max]                          |
| c15972_g1_i4 | 0.669559 | 0.245173 | -1.52914 | PREDICTED: abscisic acid 8'-hydroxylase 3-like [Glycine max]                          |
| c15972_g1_i5 | 0.693057 | 0.253778 | -1.52914 | PREDICTED: abscisic acid 8'-hydroxylase 3-like [Glycine max]                          |
| c21978_g1_i1 | 5.270099 | 1.804064 | -1.64947 | PREDICTED: phytoene dehydrogenase, chloroplastic/chromoplastic-like [Citrus sinensis] |
| c26653_g1_i1 | 0.398278 | 0.121626 | -1.76739 | PREDICTED: zeaxanthin epoxidase, chloroplastic-like [Cicer arietinum]                 |
| c12919_g2_i1 | 0        | 0.127056 | -2.38232 | putative 9-cis-epoxycarotenoid dioxygenase, partial [Fagus sylvatica]                 |
| c38441_g1_i1 | 0        | 0.162501 | -2.38232 | chalcone synthase [Rhus chinensis]                                                    |
| c22556_g1_i1 | 8.029087 | 1.530216 | -2.47563 | PREDICTED: zeaxanthin epoxidase, chloroplastic-like [Citrus sinensis]                 |
| c53134_g1_i1 | 3.842426 | 0.586232 | -2.85563 | 9-cis-epoxycarotenoid dioxygenase [Citrus hybrid cultivar]                            |
| c1330_g1_i1  | 12.50327 | 1.687759 | -3.03228 | 9-cis-epoxycarotenoid dioxygenase [Citrus hybrid cultivar]                            |

**Supplementary Table S4:** List of contigs in Dashehari transcriptome showing homology with ADH and HPPD.

| Contig_ID    | Average DOI_FPKM | Average D3I_FPKM | log2_fold change | Gene Description                                                       |
|--------------|------------------|------------------|------------------|------------------------------------------------------------------------|
| c26529_g1_i2 | 7.636641834      | 11.64417558      | 0.521973         | alcohol dehydrogenase 1 [Mangifera indica]                             |
| c26529_g1_i1 | 60.80832978      | 90.06892139      | 0.478147         | alcohol dehydrogenase 2 [Mangifera indica]                             |
| c26529_g1_i3 | 90.1268097       | 131.429044       | 0.456376         | alcohol dehydrogenase 2 [Mangifera indica]                             |
| c30227_g1_i1 | 1.191508926      | 0                | -0.55197         | alcohol dehydrogenase-like 6 [Arabidopsis thaliana]                    |
| c32724_g1_i1 | 0.794431151      | 0.270894655      | -1.64776         | putative alcohol dehydrogenase class III, partial [Solanum peruvianum] |
| c26565_g3_i1 | 30.96292952      | 15.08810691      | -1.12597         | PREDICTED: alcohol dehydrogenase class-3-like [Phoenix dactylifera]    |
| c17466_g1_i1 | 1.840384101      | 2.760242087      | 0.485864         | PREDICTED: alcohol dehydrogenase-like 6-like [Citrus sinensis]         |
|              |                  |                  |                  |                                                                        |
|              |                  |                  |                  |                                                                        |
| c27898_g1_i3 | 252.6656047      | 120.6445444      | -1.14848         | p-hydroxyphenylpyruvate dioxygenase [Mangifera indica]                 |
| c27898_g1_i2 | 234.2128947      | 114.1504734      | -1.12106         | p-hydroxyphenylpyruvate dioxygenase [Mangifera indica]                 |

## Supplementary Table S5

Primers used for real time PCR validation

|                           |                                     |
|---------------------------|-------------------------------------|
| MiSAM s Fq (c27773_g1_i2) | TGCAACTGACGAGACACCTGA               |
| MiSAM s Rq (c27773_g1_i2) | TGGGCAAGTTCCATTCTTGCG               |
| MiACSFq (c18584)          | CCCAGAAGCCTCTATCTGCAC               |
| MiACSRq (c18584)          | TTCTGAACTCTGGCAAGCCG                |
| MiACOFq (c22984_g1_i3)    | TCC CTA TAA ATA CCA CCC CAA CCT CC  |
| MiACORq (c22984_g1_i3)    | CTC AAG CTC TCC ATC TCT CAC AAA TGG |
| MiEIN3_2495Fq             | TCTACCGAAACCCGATATTCT               |
| MiEIN3_2495Rq             | GATGACAAAACGAGAGAGAACT              |
| MiEIN3_2525Fq             | CTACGGGTTGCTTTTTTCGG                |
| MiEIN3_2525Rq             | TCTTTTCTCTTCGACTTGGTTG              |
| MiETRRq (c29681_g1_i1)    | ATCAGCTGGCCATTGTGGT                 |
| MiETRFq (c29681_g1_i1)    | TCTCATGAATTGTTTCACGGGCTTA           |
| MiExpFq (c25255)          | TCCCAGTTTCATACCGCCGC                |
| MiExpRq (c25255)          | ATGTCTCCTGAACCCGCCAC                |
| MiPGFq (c26690)           | GAAAGCTGGTGGGAAGAATG                |
| MiPGRq (c26690)           | CTGTTGACGTGATGCAATCC                |
| MiCelFq (c27942)          | CAATGCTCCTCTCCTGGGTA                |
| MiCelRq (c27942)          | AATTGGATTTCGACGAAGCTG               |
| MiPelFq (c27147)          | GCTTAGGGGCAAATCCTCT                 |
| MiPelRq (c27147)          | ACGGGAGTTGTGGTGTGAT                 |
| MiActFq                   | GTGGTCGTACAACCTGGTATTGTGCT          |
| MiActRq                   | TTGCATGTGGGAGTGCATAACCCT            |
